1 **Genome-wide analysis of *Schistosoma mansoni* reveals population structure and**  
2 **praziquantel drug selection pressure within Ugandan hot-spot communities**

3

4 **Short title: Genome-wide analysis of *Schistosoma mansoni* in a Ugandan hot-spot**

5

6 Tushabe John Vianney<sup>1,2</sup>, Duncan J. Berger<sup>1</sup>, Stephen R. Doyle<sup>1</sup>, Geetha Sankaranarayanan<sup>1</sup>, Joel  
7 Serubanja<sup>2</sup>, Prossy Kabuubi Nakawungu<sup>2</sup>, Fred Besigye<sup>2</sup>, Richard E. Sanya<sup>2,3</sup>, Nancy Holroyd<sup>1</sup>,  
8 Fiona Allan<sup>4</sup>, Emily L. Webb<sup>5</sup>, Alison M. Elliott<sup>2,6\*</sup>, Matt Berriman<sup>1\*</sup>, James A. Cotton<sup>1\*</sup>

9

10 <sup>1</sup>Parasites and Microbes, Wellcome Sanger Institute, Hinxton, United Kingdom

11 <sup>2</sup>Immunomodulation and Vaccines Programme, Medical Research Council/Uganda Virus  
12 Research Institute and the London School of Hygiene & Tropical Medicine Uganda Research Unit,  
13 Entebbe, Uganda

14 <sup>3</sup>Health and Systems for Health Unit, African Population and Health Research Center, Nairobi,  
15 Kenya

16 <sup>4</sup>Department of Life Sciences, Natural History Museum, London, United Kingdom

17 <sup>5</sup>MRC International Statistics and Epidemiology Group, London School of Hygiene and Tropical  
18 Medicine, London, UK

19 <sup>6</sup>Department of Clinical Research, London School of Hygiene and Tropical Medicine, London, UK.

20

21 \*authors for correspondence: Alison.Elliott@lshtm.ac.uk, james.cotton@sanger.ac.uk,

22 matt.berriman@glasgow.ac.uk

## 23 **Author Contributions**

24

25 TJV: Formal analysis, Investigation, Writing – Original Draft Preparation, Writing – Review &  
26 Editing

27 DJB: Formal analysis, Investigation, Writing – Review & Editing

28 SRD: Formal analysis, Investigation, Writing – Review & Editing

29 GS: Investigation, Resources, Writing – Review & Editing

30 JS: Investigation, Resources, Writing – Review & Editing

31 KP: Investigation, Writing – Review & Editing

32 FB: Investigation, Writing – Review & Editing

33 RES: Conceptualisation, Investigation, Resources, Writing – Review & Editing

34 NH: Project Administration, Writing – Review & Editing

35 FA: Investigation, Methodology, Resources, Writing – Review & Editing

36 ELW: Conceptualization, Formal analysis, Methodology, Writing – Review & Editing

37 AE: Conceptualization, Project Administration, Supervision, Funding Acquisition, Writing –  
38 Review & Editing

39 MB: Conceptualization, Project Administration, Supervision, Funding Acquisition, Writing –  
40 Review & Editing

41 JAC: Formal analysis, Supervision, Writing – Original Draft Preparation, Writing – Review &  
42 Editing

43

44

45 **Abstract**

46

47 Populations within schistosomiasis control areas, especially those in Africa, are recommended to  
48 receive regular mass drug administration (MDA) with praziquantel (PZQ) as the main strategy for  
49 controlling the disease. The impact of PZQ treatment on schistosome genetics remains poorly  
50 understood, and is limited by a lack of high-resolution genetic data on the population structure  
51 of parasites within these control areas. We generated whole-genome sequence data from 174  
52 individual miracidia collected from both children and adults from fishing communities on islands  
53 in Lake Victoria in Uganda that had received either annual or quarterly MDA with PZQ over four  
54 years, including samples collected immediately before and four weeks after treatment. Genome  
55 variation within and between samples was characterised and we investigated genomic signatures  
56 of natural selection acting on these populations that could be due to PZQ treatment. The parasite  
57 population on these islands was more diverse than found in nearby villages on the lake shore.  
58 We saw little or no genetic differentiation between villages, or between the groups of villages  
59 with different treatment intensity, but slightly higher genetic diversity within the pre-treatment  
60 compared to post-treatment parasite populations. We identified classes of genes significantly  
61 enriched within regions of the genome with evidence of recent positive selection among post-  
62 treatment and intensively treated parasite populations. The differential selection observed in  
63 post-treatment and pre-treatment parasite populations could be linked to any reduced  
64 susceptibility of parasites to praziquantel treatment.

65

66 **Keywords:** *Schistosoma mansoni*, praziquantel, resistance, genetics, population structure,  
67 Uganda

## 68 **Author summary**

69 Schistosomiasis is caused by parasitic helminths of the genus *Schistosoma*. *Schistosoma mansoni*  
70 is the primary cause of intestinal schistosomiasis, a devastating and widespread parasitic  
71 infection that causes morbidity, death and socio-economic impact on endemic communities  
72 across the world and especially sub-Saharan Africa. Using whole-genome sequencing, we were  
73 able to elucidate the parasite population within Lake Victoria island fishing communities in  
74 Uganda which are among the major hotspots for schistosomiasis. We further assessed genetic  
75 markers that might be linked to recent observations concerning reduced susceptibility to  
76 praziquantel, the major drug used in the treatment of this disease. Whole-genome data on the  
77 population genetics of *S. mansoni* in an African setting will provide a strong basis for future  
78 functional genomics or transcriptomic studies that will be key to identifying drug targets,  
79 improving existing drugs or developing new therapeutic interventions.

## 80 **Introduction**

81 Schistosomiasis – also known as Bilharzia after its discoverer Theodor Bilharz [1] – is a neglected  
82 tropical disease that affects about 250 million people worldwide, most of whom live in low and  
83 middle-income countries (LMICs) [2]. To treat schistosomiasis, praziquantel (PZQ) is used for  
84 preventative chemotherapy by mass drug administration (MDA)[3] and has been used globally to  
85 treat schistosome infections since 1979 [4]. In Uganda, the ongoing use of PZQ in MDA started  
86 between 2002 and 2003 [3, 5]. The objective of MDA in these settings has historically been to  
87 reduce the prevalence and intensity of infection and hence pathology; cure and elimination are  
88 not expected in the absence of additional interventions such as improving sanitation and snail  
89 control [6, 7]. In the World Health Organisation 2021-2030 the goal has been set of reducing the  
90 proportion of people with high-intensity infections to < 1% and thereby to eliminate  
91 schistosomiasis as a public health problem in all countries in sub-Saharan Africa by 2030 [8]. The  
92 expectation is that this will be achieved primarily by increasing the frequency and coverage of  
93 treatment with PZQ – the sole drug commonly used for schistosomiasis MDA –which could  
94 inadvertently increase drug selection pressure on parasite populations.

95

96 There is a growing body of evidence that MDA programmes may affect how parasite populations  
97 respond to treatment, for example, through reduced efficacy of PZQ in lowering egg output in  
98 communities that have received multiple rounds of PZQ MDA [9, 10], but there is little evidence  
99 that this is a widespread phenomenon [11, 12]. Reduced genetic diversity of parasite populations  
100 has also been associated with reduced susceptibility of the parasites to PZQ [13], with reports

101 from Senegal having earlier linked such outcomes to potential drug resistance [14]. The  
102 development of drug resistance in natural populations would be a major health concern.  
103 Furthermore, *in vitro* studies have shown that resistance to PZQ can be selected for in *S. mansoni*  
104 [13, 15-17]. There is growing interest in understanding the impact of continued PZQ  
105 monotherapy on the parasite genome in order to detect the potential development of resistance  
106 to this drug as early as possible [18, 19], and understand the mechanism(s) of resistance. One  
107 clue to resistance can come through understanding the mode of action of a drug. The activity of  
108 PZQ has not been clearly understood, but recent findings suggest that the drug activates  
109 schistosome Ca<sup>2+</sup>-permeable transient receptor potential (TRP) channel (Sm.TRMPZQ) [20],  
110 hence making it the primary target for PZQ action on schistosomes. Recently, a genetic cross  
111 involving a schistosome line experimentally selected for PZQ resistance identified this TRP  
112 channel as likely responsible [21], but it is not yet clear that this locus is involved in variation in  
113 PZQ efficacy in the field. Other candidate genes have been proposed, for example the *S. mansoni*  
114 P-glycoprotein (*smdr2*), which shows increased protein expression in male worms following  
115 exposure to sub-lethal doses of PZQ [16]. Susceptibility of the parasites to PZQ might involve  
116 multiple interactions between the drug, the parasite, and the respective host.

117  
118 Collecting high-resolution genetic data from parasite populations under drug selection pressure  
119 may lead to new insights into the mode of action of PZQ or the mechanism of potential resistance  
120 to the drug. Furthermore, population genetic data from parasite populations will also give  
121 insights into the population biology of the parasite. This is vital for understanding schistosomiasis  
122 epidemiology, transmission, disease severity and why certain communities might respond better

123 to treatment than others, especially within regions where drug selection pressure is being  
124 applied[22]. While lower-resolution markers have been extensively used (e.g.[23, 24]), much of  
125 our detailed understanding of schistosome population genetics has come from studies using  
126 microsatellite markers to describe the genetic structure of populations of *S. mansoni* [25-27] and  
127 other schistosome species [28, 29]. This work has revealed genetic differentiation between  
128 parasite populations that are geographically separated (e.g [30-33]), but panmictic populations  
129 and very high within-host diversity within disease foci (e.g. [34, 35]). The population genetics of  
130 African schistosomes has recently been reviewed [36]. Microsatellite markers have also been  
131 employed to investigate both basic questions about parasite biology (e.g. [37]) as well as more  
132 applied, operational questions about schistosome control [22]. In particular, a few studies have  
133 shown changes in genetic diversity of schistosomes with praziquantel MDA [4, 38, 39], but other  
134 studies have failed to find this effect [40] particularly with longer-term follow-up [41] suggesting  
135 any genetic response to treatment may be only temporary [42].

136

137 With their high levels of polymorphism, microsatellite loci are powerful molecular markers, but  
138 inevitably represent only a small proportion of the parasite genome. There is an increasing  
139 amount of genome-scale data available for schistosome populations. A number of studies have  
140 used exome capture [43] to describe introgression between *Schistosoma* species [44] and to  
141 study the historical demography of schistosomiasis in the Americas [45]. Restriction site-  
142 associated sequencing (ddRAD-seq) has been used to demonstrate strong genetic structure in  
143 remaining endemic hot-spots of *S. japonicum* transmission [46, 47]. While providing high-  
144 resolution data in a cost-effective way, these reduced-representation sequencing approaches



145 have some drawbacks, for example in identifying small haplotype blocks from ancient  
146 introgression [44]. Whole-genome data gives a more comprehensive picture of genetic variation,  
147 including non-coding variation, and so has the potential to provide more insights into  
148 understanding the population genetics of this species. While reference genome assemblies are  
149 available for a number of schistosome species [48-54], large-scale genome-wide variation data is  
150 only available from one *S. mansoni* population [55], with a number of other populations and  
151 other species most being represented by relatively few specimens [53, 56-58]. Efforts in  
152 elucidating the parasite population genetic structure have proven very helpful in understanding  
153 drug resistance or transmission mechanisms in other parasite species: most notably in the  
154 malaria parasite *Plasmodium falciparum* [59, 60] for which very extensive genome data is  
155 available [61].

156

157 Within Uganda, the Lake Victoria Island Intervention Study on Worms and Allergy-related  
158 diseases (LaVIISWA) was a cluster-randomised clinical trial [62] examining the impact of intensive  
159 (quarterly) versus standard (annual) PZQ treatment. While the study was primarily designed to  
160 assess the impact of anthelmintic treatments on allergy-related outcomes, prevalence and  
161 intensity of *S. mansoni* was a secondary outcome with results suggesting a plateauing of  
162 infection, after an initial decline in intensively treated villages [63]. To assess this outcome, a pilot  
163 study in the fourth year of the LaVIISWA trial investigated cure rate and Egg Reduction Rate (ERR)  
164 [10]. A lower cure rate and ERR was seen among people receiving quarterly (intensive) treatment  
165 (n=61; cure rate 50.8%, 95% confidence interval (CI): 37.7% to 63.9%; ERR 80.6%, 95% CI: 43.8%  
166 to 93.7%) than in those receiving a single annual standard dose (n=49, cure rate 65.3%, 95% CI:

167 50.4% to 78.3%; ERR 93.7%, 95% CI: 84.9% to 97.7%) [10]. The WHO recommends an ERR of 90%  
168 for effective PZQ treatment [9, 64]. While the sample size available precluded finding compelling  
169 statistical evidence, these results are suggestive of the first signs of reduced efficacy of PZQ  
170 treatment in the more intensively treated population, and that the plateau in reduction of  
171 infection during the intervention study could be due to PZQ resistance. These islands thus  
172 represent a 'hot spot' in which high baseline prevalence [62] of schistosomiasis has persisted  
173 despite multiple years of treatment [10, 65].

174  
175 Here, we sought to establish genome-wide data on the population genetics of parasites present  
176 in this study population, with the ultimate goal of assessing the effects of MDA on parasite  
177 genome evolution. We take advantage of the opportunity to investigate these in the context of  
178 a randomised intervention trial within a defined geographical area, allowing us to compare the  
179 effects of geographical isolation and treatment intensity on genetic variation in this population.  
180 By comparing samples taken immediately before and after a treatment round at the end of the  
181 LaVIISWA study in the two treatment arms and for multiple villages (the level of randomisation  
182 in the study), we can investigate whether the genetic impact of a single treatment dose varies  
183 with history of drug exposure. Building on the evidence that there may be differences in  
184 treatment efficacy between treatment arms, we investigated whether the signatures of natural  
185 selection across the genome differ with previous drug exposure. We also compare these data  
186 with recently published genomic data from other Ugandan *S. mansoni* populations.

187

188

189 **Methods**

190 **Ethical considerations**

191

192 This work was not expected to result in any harm to participants. Ethical approval was given by  
193 the Uganda Virus Research Institute (reference number GC127), the Uganda National Council for  
194 Science and Technology (reference number HS 1183) and the London School of Hygiene &  
195 Tropical Medicine (reference number 6187). As previously detailed [62], written informed  
196 consent was received from all adults and emancipated minors and from parents or guardians for  
197 children; additional assent was obtained from children aged  $\geq 8$  years.

198

199 **Sample selection and study site**

200 Participants were selected from four villages each from the standard and intensive treatment  
201 arms from among the 27 study villages of Lake Victoria Island Intervention Study on Worms and  
202 Allergy-related diseases (LaVIISWA) trial [62, 63] at the end of its fourth year. The participants  
203 involved children and adults as previously described [62]. The villages in the standard arm  
204 received PZQ once a year while those in the intensive arm received PZQ four times a year during  
205 the LaVIISWA trial period. The standard villages sampled were Kakeeka, Kachanga, Zingoola and  
206 Lugumba. The intensive villages were Busi, Kitosi, Kisu and Katooke (Fig. 1).

207

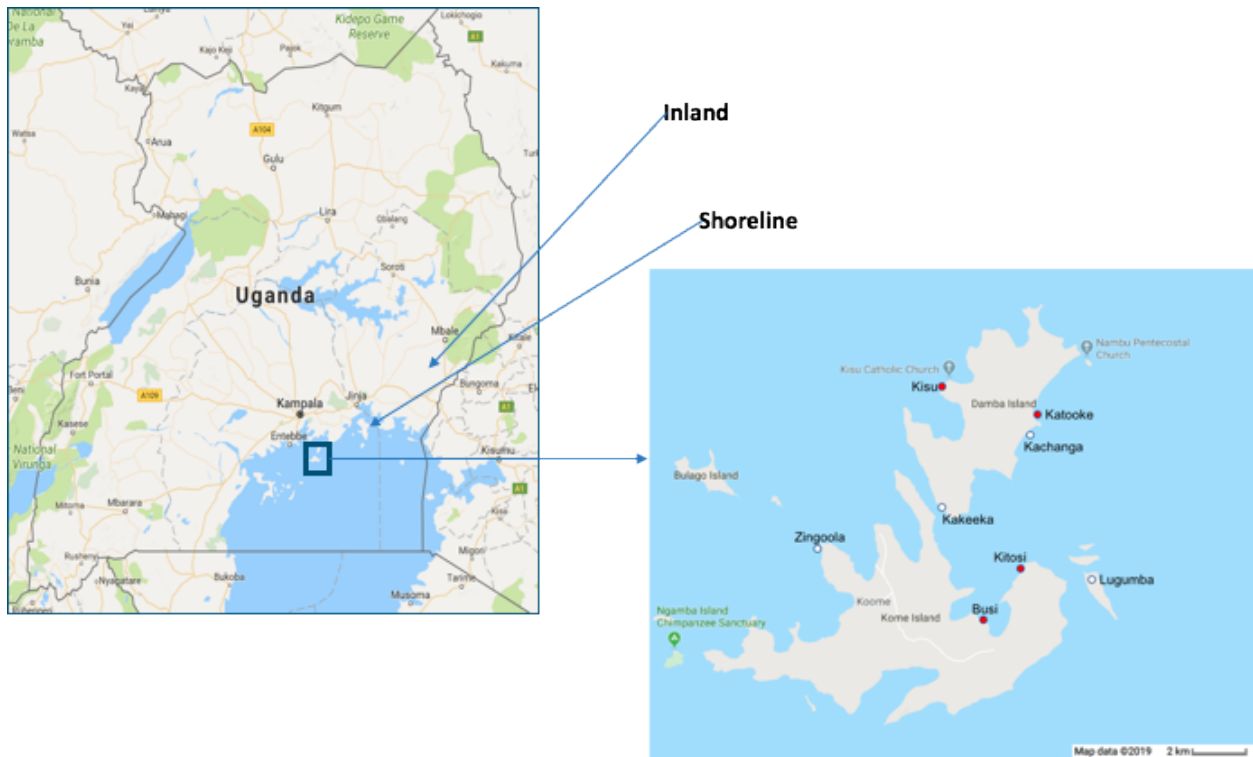

208

209 **Fig 1. Location of sample sites within Uganda.** Villages with white dots received standard  
210 (annual) intervention, those with red dots received intensive (quarterly) intervention. Outgroup  
211 samples were obtained from locations marked as inland and shoreline. Map data copyright 2019  
212 Google.

213

214

215 Sample selection and collection was carried out as previously described in the parasitological  
216 survey [10]. The stool samples (collected from participants who tested positive for urine CCA)  
217 were processed for two Kato Katz slides as previously described [10] and miracidia hatching  
218 provided suitable material for DNA extraction. Participants were then treated, under  
219 observation, with a single dose of PZQ at 40 mg/kg (estimated by height pole), in accordance with  
220 the trial MDA procedures. Individuals whose pre-treatment sample tested positive for

221 schistosome eggs by Kato Katz were followed up after four weeks and both Kato Katz and  
222 miracidia hatching were repeated. Miracidia hatching was carried out from each of these  
223 participants and the resultant miracidia were stored on Whatman FTA cards until DNA was  
224 extracted.

225

## 226 **Miracidia hatching**

227 Miracidia hatching was carried out following previously described protocols [31]. In brief, the  
228 stool sample was homogenised through a metal sieve, then further washed and filtered using a  
229 Pitchford funnel assembly [66] consisting of a 40 µm sieve placed inside a 200 µm outer sieve.  
230 Stool samples were washed using deionised water (Rwenzori Bottling Company, Uganda). The  
231 concentrated *S. mansoni* eggs were transferred to a Petri dish in clean water and exposed to  
232 indirect sunlight to induce the hatching of miracidia. Hatching was performed in natural light  
233 (environmental conditions) with intervals of exposure to sunlight and cover depending on  
234 weather conditions. The time taken for miracidia to emerge varied between samples, so the Petri  
235 dishes were intermittently checked for the presence of miracidia for a maximum of 48 hours.  
236 Miracidia were picked in 1.5 – 5µl of water and then transferred to a second dish of deionised  
237 water to dilute bacterial contamination before being placed on Whatman indicating FTA cards  
238 (Qiagen) and left to dry. The FTA cards were wrapped in aluminium foil to keep them away from  
239 continued direct light and placed in ziplock bags with silica gel in a cardboard drawer.

240

## 241 **Whatman FTA DNA Extraction**

242 DNA was extracted using a modified CGP buffer protocol as previously described [67, 68]. The

243 individual spots containing miracidia were punched from the FTA cards using a 2 mm Harris  
244 micro-punch and placed in 96-well plates. Protease buffer was prepared using Tris-HCl pH 8.0 (30  
245 mM), Tween 20 (0.5%), IGEPAL CA-630 (0.5%), protease (1.25 µg/ml; Qiagen cat #19155) and  
246 water. Digestion was done by adding 32 µl of the protease buffer to each of the wells on the 96-  
247 well plate containing the punched spots from the FTA cards. The plate was vortexed to mix and  
248 spun down before incubation at 50°C for 60 min, 75°C for 30 min. Miracidia lysates containing  
249 DNA were transferred to a new labelled plate and stored at 4°C until used.

250

## 251 **Library preparation and sequencing**

252 DNA sequencing libraries were prepared using a protocol designed for library preparation of  
253 Laser Capture Microdissected Biopsy (LCMB) samples using the Ultra II FS enzyme (New England  
254 Biolabs) for DNA fragmentation as previously described [68]. The LCMB library preparation  
255 method is optimised for uniform, low-input samples. A total of 12 cycles of PCR were used to  
256 amplify libraries and to add a unique 8-base index sequence for sample multiplexing. The LCMB  
257 library preparation protocol is optimised for uniform, low input samples. A total of 174 samples  
258 were sequenced on two NovaSeq lanes, 108 on one lane and 66 on another lane. These 174  
259 samples were chosen as having more than 10% of reads mapping to *S. mansoni* based on  
260 preliminary low-coverage genome sequencing of all 214 samples collected in the field.

261

## 262 **Mapping and SNP calling**

263 The reads were mapped to the *S. mansoni* reference genome v7 (GCA\_000237925.3) [54] using  
264 the BWA-MEM algorithm in Burrows-Wheel Aligner software (BWA) (VN:0.7.15-r1140) to

265 produce SAM files which were then converted to BAM format using Samtools v1.14 . This version  
266 of the reference genome was modified to remove haplotypes in order to improve mapping  
267 accuracy, as previously described [55]. PCR duplicate reads were identified using Picard v1.92  
268 [69] and flagged as duplicates in the BAM file.

269 SNP variants were called using the GATK Haplotype Caller (v4.1.4.1) to find sites that differ  
270 from the *S. mansoni* reference genome followed by variant QC to remove low confidence SNPs  
271 and regions of consistently poor calls. The SNPs were hard-filtered in GATK to remove SNP calls  
272 with the following parameters: QD) < 2.0; MQ < 40; FS) > 60.0; SOR > 3.0; MQRankSum < -12.5;  
273 ReadPosRankSum < -8.0. The variants were further filtered using vcftools\_0.1.15 [70] to remove  
274 sites with high missingness (--max-missing 0.95), low minor allele frequency (--maf 0.01) and to  
275 retain only biallelic SNPs (--min-alleles 2 --max-alleles 2).

276

## 277 **Identification of population structure**

278 The three islands on which the population structure was assessed were Koome, Damba and  
279 Lugumba in the Mukono district of Uganda. An outgroup made up of inland and shoreline  
280 samples was also included, consisting of 27 samples collected in a previous study [9] and for  
281 which whole-genome sequence data were recently published [55] from Tororo and Mayuge  
282 districts in Eastern Uganda. Tororo and Mayuge are approximately 120 km apart. Mayuge district  
283 is a shoreline district located about 100 km from Mukono district. Both districts are located in  
284 south eastern Uganda, with Tororo being the inland district (Fig. 1).

285

## 286 **Test for genetic differentiation**

287 The fixation index ( $F_{ST}$ ) statistic was calculated between each of the villages across the different  
288 islands and treatment groups (standard, intensive, pre-treatment and post-treatment) to  
289 measure population differentiation due to genetic structure. The  $F_{ST}$  was calculated using vcfTools  
290 (version 0.1.15) [55] on the vcf file containing biallelic filtered SNPs. Mean  $F_{ST}$  was calculated from  
291 genome-wide weighted  $F_{ST}$  values with 99% symmetric bootstrap confidence intervals calculated  
292 using R version 3.5.1 (2018-07-02). We fitted a gravity model as

$$293 \log(N_m) = \log(G) + a \cdot \log(P_i \cdot P_j) - Y \cdot \log(D_{ij}) + \epsilon,$$

294 where  $N_m$  is an estimated number of migrants per generation, calculated from the  $F_{ST}$  between  
295 villages as:

$$296 N_m = 0.25((1/F_{ST}) - 1)$$

297 And  $G$  is the linear distance between the villages. In  $(P_i \cdot P_j)$ ,  $P_i$  and  $P_j$  represent the population  
298 sizes of the two villages compared. Models were fitted using R version 4.02, with the MuMIn  
299 package v1.43 to assess model importance. Code for these analyses is available at  
300 [https://github.com/jacotton/LaVIISWA\\_genomes](https://github.com/jacotton/LaVIISWA_genomes).

301

## 302 **Nucleotide diversity**

303 Nucleotide diversity ( $\pi$ ,  $\pi$ ) was computed from high-confidence bi-allelic filtered SNPs using  
304 vcfTools 0.1.15 [70]. The genome-wide nucleotide diversity was calculated from a list of positions  
305 for each of the time points (pre- and post) and treatment groups (standard and intensive) using  
306 the option in vcfTools '--site-pi' respectively. The average nucleotide diversity within each of the  
307 groups was calculated individually and the symmetric 99% bootstrap confidence intervals of the  
308 averages were estimated using R version 3.5.1. Statistical significance of differences between



309 group means was assessed by whether the confidence interval for one mean was disjoint from  
310 the mean of other groups. Effective population size ( $N_e$ ) was estimated from nucleotide diversity  
311 using the relationship  $\pi = 4.N_e.\mu$  [71] with the mutation rate  $8.1 \times 10^{-9}$  [57].

312

### 313 **Determination of rare allele sharing and kinship analysis**

314 To identify the pairwise rare allele sharing we used a Perl script from Shortt et al. [47] available  
315 at <https://github.com/PollockLaboratory/Schisto>. We filtered for minor allele frequency  $\leq 0.1$   
316 and sampled 500 SNP sites in 30 different generations. We then computed the mean value from  
317 the 30 generations for each pair. Allele-sharing scores were visualised in R version 4.0.2 using  
318 igraph v1.2.6 [72]. Significance of differences in mean allele sharing between groups were  
319 calculated against a non-parametric null distribution for each comparison generated by randomly  
320 permuting group labels 1000 times and calculating differences in mean allele sharing for each  
321 permutation.

322

### 323 **Test for selection**

324 To test for recent positive selection within the treatment arms and between pre-treatment and  
325 post-treatment, the cross-population extended haplotype homozygosity (XP-EHH) test [73] was  
326 performed. XP-EHH is designed to detect whether either an ancestral or derived allele is  
327 undergoing selection within a given population. The XP-EHH test has the power to detect weaker  
328 signals of selection as it compares two closely related populations giving a directional score. The  
329 XP-EHH detects selective sweeps in which the selected allele has approached fixation in one  
330 population but remained polymorphic in another population. A VCF file containing only bi-allelic

331 SNPs was subset into respective chromosomes. A genomic linkage map for each of the  
332 chromosomes was computed for each individual chromosome using the adjusted map length in  
333 centimorgan (cM) for the respective chromosomes [74]. The haplotypes from each of the  
334 chromosomes were then phased separately with their respective genomic map using Beagle v5.0  
335 [75]. The XP-EHH test was performed using Selscan v1.2.0a [76] and the output XP-EHH scores  
336 were normalised for subsequent analysis using the norm program distributed with v1.2.0a of  
337 Selscan. Functional enrichment was assessed using g:Profiler version (e99\_eg46\_p14\_f929183)  
338 [77] at a g:SCS threshold of 0.05 against a background of all annotated genes in *S. mansoni*,  
339 revealing genes showing significant purifying selection among the intensive and post-treatment  
340 parasite populations.

341

### 342 **Estimate of per-individual egg reduction rate (ERR) and association test**

343 The posterior distribution for the ERR based on data from each individual for whom both pre-  
344 and post-treatment egg count data were available was estimated using a generalised linear  
345 mixed-effect model [78], incorporating nested random effects for treatment arm, village and  
346 individual. Means of the marginal posterior distribution per individual were used as quantitative  
347 phenotypes for an association study, testing all 6,967,554 called SNP variants. The model used was a  
348 linear regression of each SNP genotype against mean ERR, using 20 principal components as covariates  
349 to control for population structure, calculated using the '--linear' and '--pca' flags in plink v1.9  
350 [79]. Code for these analyses is available at [https://github.com/jacotton/LaVIISWA\\_genomes](https://github.com/jacotton/LaVIISWA_genomes).

351

352

## 353 **Results**

### 354 **Population stratification**

355 After filtering, 6,967,554 high-confidence SNPs were retained (out of 18,716,072 unfiltered SNPs)  
356 from 174 individual miracidia. Principal components analysis of these high confidence SNPs  
357 showed little genetic structure within the island parasite populations on the first four principal  
358 components, which together represent 49% of the genetic variation. In particular, we found no  
359 evidence of population stratification between the standard (annual treatment) and intensive  
360 arms (quarterly treatment) or between pre- and post-treatment samples from these fishing  
361 communities (S2 Figure). The shoreline samples (from Mayuge district) clustered more closely  
362 with the island (Mukono district) parasite populations as compared to the inland samples (from  
363 Tororo district) (Fig. 2), but inland parasites were distinct from most island samples on principal  
364 component 3. The large-scale geographical pattern reflects the known genetic differentiation  
365 between inland and shoreline populations [55]. We also found that the island population is  
366 strikingly more diverse than either of the other populations (Fig. 2). While this is partly due to  
367 the larger number of samples included here, a larger sample of the shoreline and inland  
368 populations studied elsewhere also did not appear as diverse as the island population [55]. A  
369 number of miracidia appeared quite distinct from the main cluster of individuals on principal  
370 component 2. These divergent parasites were mostly (8 out of 9) from the islands and came from  
371 four different villages (Busi, Kakeeka, Zingoola, Katooke), with one from a shoreline village  
372 (Bwondha; S4 figure). Although participants were all resident in the villages throughout the  
373 LaVIISWA trial for at least 3 years before this study, there is a great deal of migration to the islands  
374 from other parts of the shoreline of Lake Victoria, including Kenya and Tanzania; therefore, we

375 suspect these miracidia represent parasites imported from other populations that we have not  
376 sampled here.

377

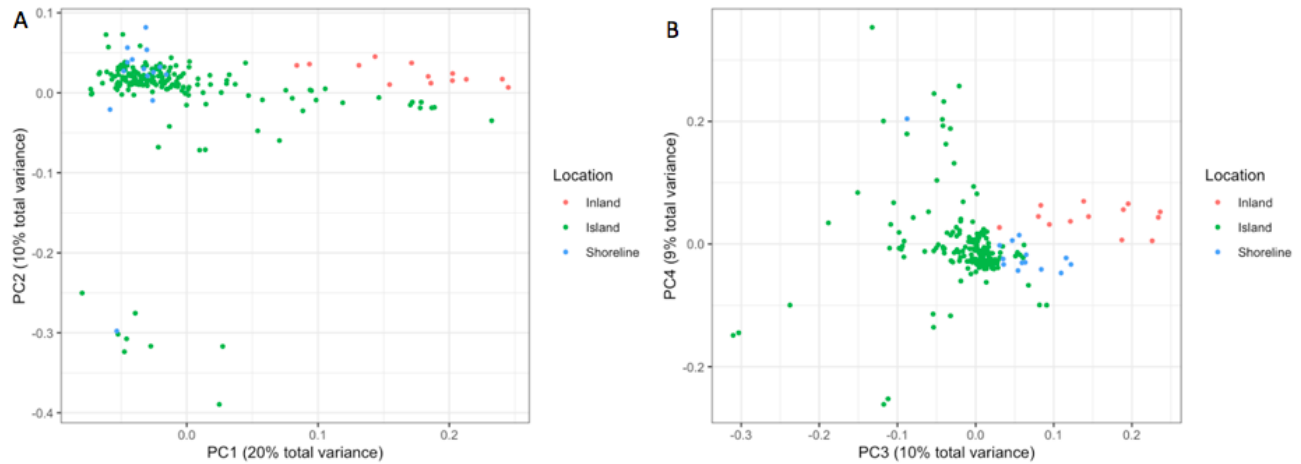

378

379

380

381 **Fig 2. Principal components analysis of genetic variation within study samples and comparator**

382 **Ugandan populations.** (A) Shows the first two principal components and (B) the third and fourth

383 principal components. Each point represents a single miracidium, coloured by the population

384 from which they are sampled, with 'Shoreline' samples from Mayuge district and 'Inland' from

385 Tororo district.

386

387 **Rare allele sharing and kinship analysis**

388 To investigate direct relatedness between individual parasites, we adopted an approach based

389 on determining the level of sharing of rare alleles (defined by their population frequency being

390 less than or equal to 10%) between samples [47]. This approach has recently been used to study

391 *S. japonicum* populations in China with whole-genome data [58]. By definition, most unrelated  
392 individuals share very few rare alleles; here we found slightly higher average proportion of rare-  
393 allele shared between pairs of miracidia isolated from the same individuals (0.1028) than in other  
394 comparisons (from the same village 0.0874, between villages on the same island 0.0862, between  
395 islands 0.0856). Differences between average allele sharing proportions were significant for  
396 comparing intrapopulation and within village groups (observed difference 0.0154, p-value from  
397 permutation test  $p < 0.001$ ) and within-village to within-island groups (observed difference  
398 0.0012,  $p \sim 0.002$ ) but only marginally so for within-island and between-island comparisons  
399 (observed difference 0.0006,  $p \sim 0.011$ ). These data suggest an increase in relatedness within  
400 populations and possibly some geographical signature of increased relatedness.

401  
402 We found three miracidia collected from the same infected individual at the same time with rare  
403 allele sharing of at least 0.3, and used these to calculate the average allele sharing for first-degree  
404 relatives (full siblings or parent-offspring) of 0.403 (actual values 0.4, 0.4014 and 0.409). This  
405 value is slightly lower than the theoretically expected level of identity-by-descent of 0.5, but with  
406 only three observations it is not possible to exclude that this difference is due to chance. Similarly,  
407 the average rare allele sharing for pairs of miracidia from different islands was 0.086, which  
408 represents our best estimate for the level of sharing in unrelated individuals. The small number  
409 of miracidia available for putative first-degree relatives means the observed variance from our  
410 data is very small, and so our final classification is thus deterministic. We classified miracidia pairs  
411 sharing more than 0.3105 of these rare alleles as first-degree relatives, 0.1981-0.3104 as second-  
412 degree relatives, 0.1419-0.1980 as third-degree relatives, 0.1138-0.1418 as fourth-degree

413 relatives and 0.0956-0.1138 as fifth-degree relative, while those with less than 0.0956 sharing  
414 were classified as unrelated.

415

416 While 24% of pairs of samples from the same individual were classified as being related, only 10%  
417 of other comparisons appeared related (Fig. 3 A,B;  $\chi^2 = 21.785$ , 1 df,  $p = 3.05 \times 10^{-6}$ ), and a similar  
418 pattern held for close relatives (Fig. 3 A,B; first and second degree relatives represented 4% of  
419 within-infrapopulation comparisons, but 0.05% of all comparisons;  $\chi^2 = 183.37$ , 1 df,  $p < 2.2 \times 10^{-6}$ ).  
420 There was no significant enrichment in related pairs of miracidia with either treatment  
421 intensity or for samples collected pre- and post-treatment. We found five pairs of first-degree  
422 relatives in total (Fig. 3C); but one pair were from different islands (marked 1 on Fig. 3C) and a  
423 second pair were from different individuals sampled on consecutive days in Kakeeka village  
424 (marked 2 on Fig. 3C). On the face of it, this would imply that the same combination of clonal  
425 cercariae infected these people, which seems very unlikely – particularly for the geographically  
426 separated cases. We cannot exclude the possibility that either the high level of rare allele sharing  
427 is misleading in these cases, or errors in sample identification. The remaining three pairs of first-  
428 degree relatives were pairs of miracidia sampled from single individuals in Busi, Kitosi and Kisu  
429 villages on consecutive days. Interestingly, a miracidium sampled from the same individual in Kisu  
430 was a second-degree relative of the first-degree pair, but this was collected post-treatment 37  
431 days later. This is one of only 8 pairs of second-degree relatives. This suggested that either an  
432 adult worm survived treatment but changed 'partners' (to produce a half-sibling or avuncular  
433 relationship) during this period, or two clonal worms with genetically distinct partners were  
434 present in this host at the two timepoints and produced these miracidia.

435

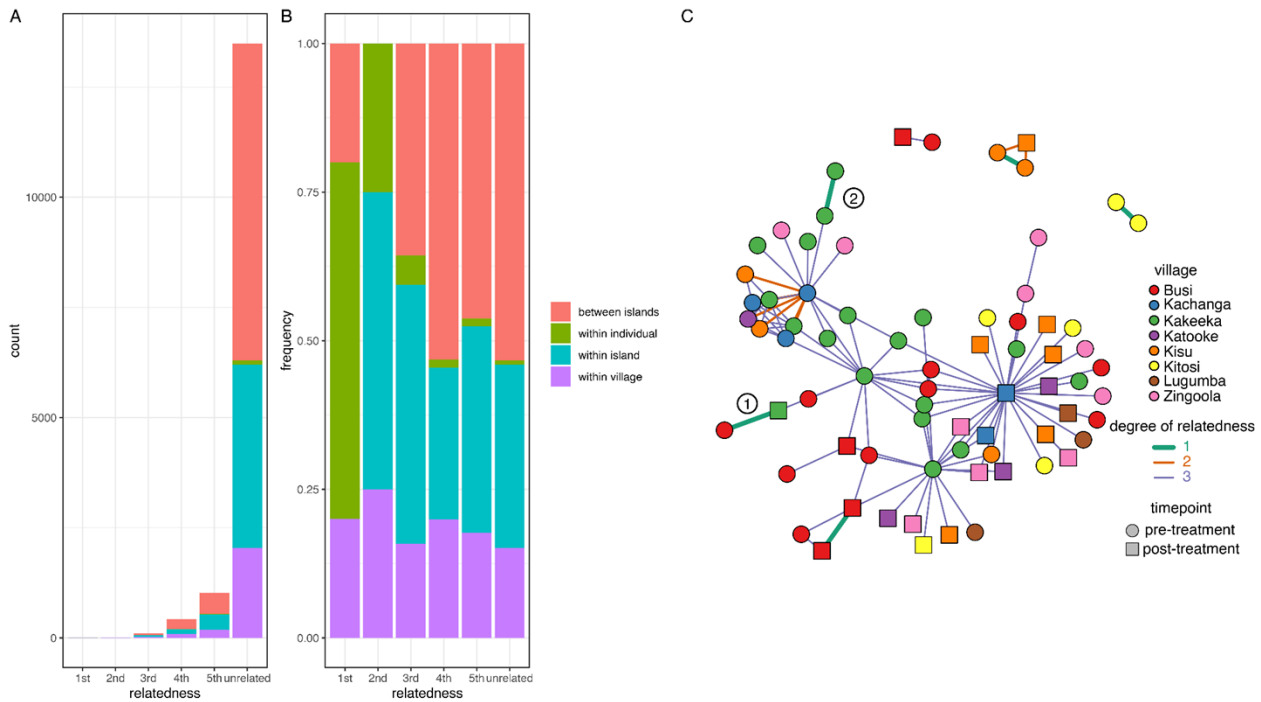

436

437 **Fig 3. Patterns of relatedness inferred from pairwise rare allele sharing.** (A) Number and (B)  
438 proportion of pairs of miracidia showing each degree of relatedness for miracidia sampled from  
439 the same individuals, villages or islands and for those on different islands. (C) Network  
440 representation of 1st, 2nd and 3rd degree relatedness. Vertices represent individual miracidia  
441 sampled, coloured by village and with a circle for samples taken pre-treatment and square for  
442 post-treatment samples. Edges join vertices inferred to share 1st, 2nd or 3rd degree relatedness,  
443 as indicated by both the width and colour of each edge. Numerical labels indicate two 1<sup>st</sup> degree  
444 relationships discussed in the text.

445

### 446 **Analysis of genetic differentiation between villages**

447 To further investigate genetic structure within the island population, we calculated  $F_{ST}$  (the  
448 proportion of genetic variation explained by population structure) for each pair of villages. As we

449 expected,  $F_{ST}$  between villages was very low (maximum 0.0067), indicating little or no geographic  
450 structure to our data. We observed higher genetic differentiation between villages on different  
451 islands compared to those within the same island, but the small number of pairwise comparisons  
452 ( $N = 8$  villages, 28 pairwise comparisons) meant that we did not have sufficient statistical power  
453 to detect any difference ( $p = 0.082$ , 1-way ANOVA of between/within village vs  $F_{ST}$ ). The villages  
454 were between 1 and 13 km apart, but there was no significant relationship between the distance  
455 between villages and  $F_{ST}$  (Fig. 4). To explore the geographical structure in these data more fully,  
456 we also fitted a gravity model attempting to explain  $F_{ST}$  between each pair of villages by the  
457 distance between villages, the population of each village and a factor capturing the effect of being  
458 on the same island. In this model, none of the explanatory variables had a significant influence  
459 on  $F_{ST}$ , but the location of villages on the same island vs different islands was the most important  
460 variable with a likelihood weight in the best-fitting models of 0.48, while 0.31 for linear distance  
461 between villages and 0.23 for the product of village populations.

462



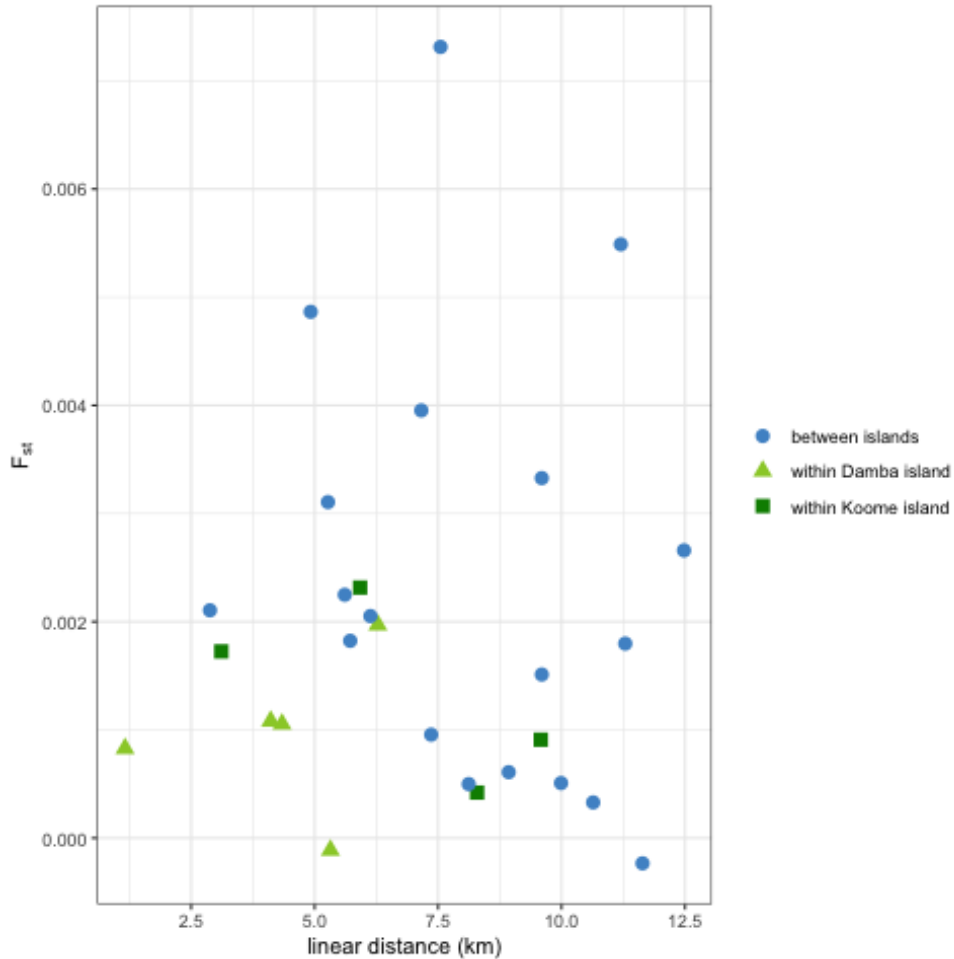

463

464

465 **Fig 4. Pairwise  $F_{ST}$  estimates do not vary with linear distances between villages.** Weir and  
466 Cockerham  $F_{ST}$  estimates used and distance measured in kilometres. Points show results of  
467 pairwise comparison between samples from different villages found on different islands or from  
468 different villages with Damba or Koome islands.

469

#### 470 **Within-population genetic diversity**

471 When comparing all pre- and post-treatment samples, we observed a very small but significant  
472 difference ( $p < 0.01$ ) in genetic diversity between samples taken before and after treatment, with

473 the 99% confidence interval for the mean nucleotide diversity in pre-treatment samples not  
474 overlapping with the mean post-treatment nucleotide diversity. This is consistent with a small  
475 effect of a single PZQ treatment round on the parasite population (Table 1). There was also lower  
476 diversity in parasites collected from villages in the intensive arm of the study than in the standard  
477 arm (Table 1), possibly reflecting a longer-term effect of more frequent PZQ treatment in these  
478 locations, despite the high levels of gene flow apparent between these locations implied by the  
479 very small levels of genetic differentiation we report. While this trend was consistent in both pre-  
480 and post-treatment samples, the difference between trial arms was most pronounced in post-  
481 treatment populations (Table 1). These diversity values are very similar to those observed in a  
482 recent study of the parasite populations on the lake shore and inland sites [55]. Using the  
483 mutation rate estimated previously [57], this implies an effective population size of around  $10^5$   
484 individuals from this sample collection, just outside the upper confidence limit of the estimate  
485 for the East Africa population in the previous study ( $3.67-9.35 \times 10^4$ ) [57], and much higher than  
486 estimates from individual schools on the Lake Victoria shoreline ( $3.30-3.69 \times 10^4$ ) [55],  
487 highlighting the diversity of *S. mansoni* parasites present on the islands.

488 **Table 1. Genome-wide average nucleotide diversity ( $\pi$ )**

489

| Group                    | Average $\pi$         | 99% confidence interval |                       |
|--------------------------|-----------------------|-------------------------|-----------------------|
| Pre-treatment            | $3.25 \times 10^{-3}$ | $3.22 \times 10^{-3}$   | $3.29 \times 10^{-3}$ |
| Post-treatment           | $3.20 \times 10^{-3}$ | $3.16 \times 10^{-3}$   | $3.23 \times 10^{-3}$ |
| Pre-treatment standard   | $3.27 \times 10^{-3}$ | $3.23 \times 10^{-3}$   | $3.32 \times 10^{-3}$ |
| Pre-treatment intensive  | $3.23 \times 10^{-3}$ | $3.20 \times 10^{-3}$   | $3.26 \times 10^{-3}$ |
| Post-treatment standard  | $3.24 \times 10^{-3}$ | $3.21 \times 10^{-3}$   | $3.27 \times 10^{-3}$ |
| Post-treatment intensive | $3.16 \times 10^{-3}$ | $3.12 \times 10^{-3}$   | $3.19 \times 10^{-3}$ |

490

491

492 **Genetic differentiation with treatment between standard and intensive arms**

493 Genome-wide average genetic differentiation was slightly higher (mean  $F_{ST}$   $3.9 \times 10^{-4}$ ; bootstrap  
494 99% CI:  $2.5 \times 10^{-4}$  -  $5.3 \times 10^{-4}$ ) between standard and intensive treatment populations post-  
495 treatment than before treatment (mean  $F_{ST}$  =  $3.4 \times 10^{-4}$ ; 99% CI =  $1.8 \times 10^{-4}$  –  $5.0 \times 10^{-4}$ ), but these  
496 values did not differ significantly. We also find very low genetic differentiation between standard  
497 and intensive trial arms (mean  $F_{ST}$   $5.6 \times 10^{-4}$ ; 99% CI =  $5.2 \times 10^{-4}$  -  $6.0 \times 10^{-4}$ ). There was also variation  
498 in these  $F_{ST}$  values across the genome. While much of this likely reflects sampling variation (Fig.  
499 5A), particularly striking was a region identified on chromosome 5 (Fig. 5B) with a distinct peak  
500 of divergence among post-treatment parasite populations. This window spanned 1.21 Mb of

501 genomic sequence (from SM\_V7\_5: 7.78-8.99 Mb) and contained 25 annotated protein-coding  
502 genes (S2 table).

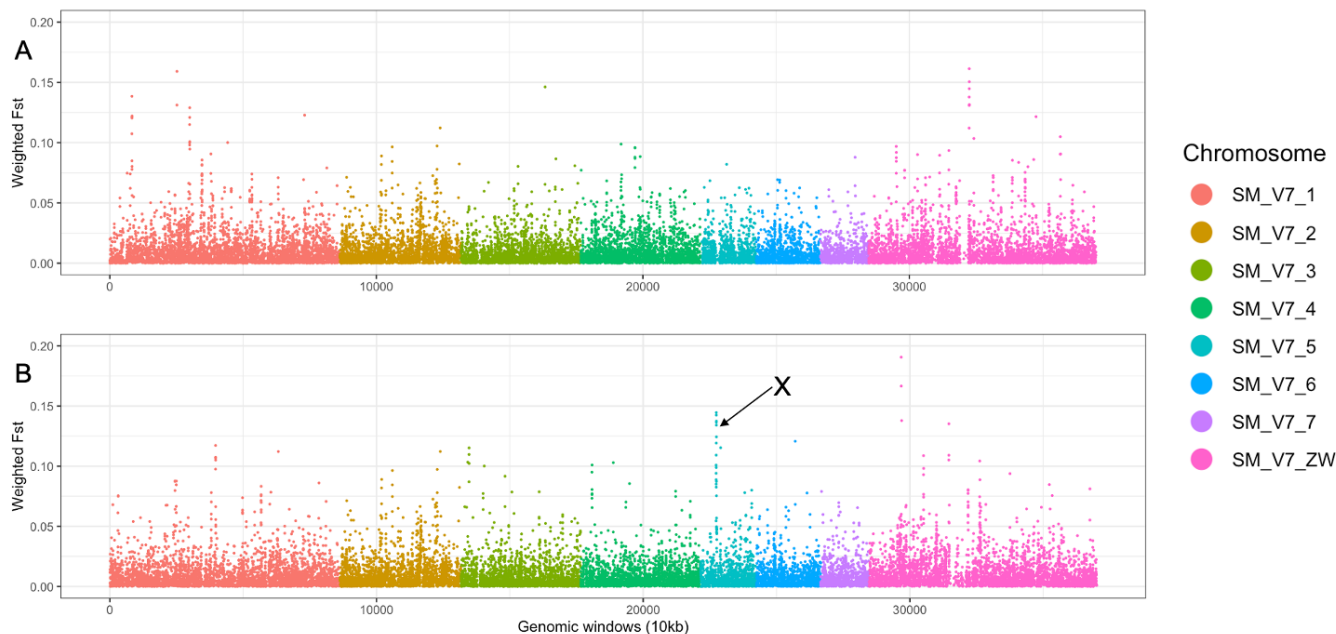

503  
504  
505 **Fig 5. Genome-wide genetic differentiation between standard and intensive populations.  $F_{ST}$**   
506 **calculated using pre-treatment (A) and post-treatment (B) samples. X marks the region of high**  
507 **post-treatment genetic differentiation discussed in the text. Each point represents the mean  $F_{ST}$**   
508 **between genomic windows of 10 kb for all the called SNPs, with different coloured points**  
509 **representing SNPs on each chromosome.**

### 510 511 **Analysis of signatures of selection**

512 We used the XP-EHH test to identify genomic regions under differing selection pressures in  
513 separate comparisons between standard and intensive treatment arms (Fig. 6A) and between  
514 pre- and post-treatment samples (Fig. 6B). Taking extreme XP-EHH scores of  $< -2$  or  $> 2$  as a cutoff,

515 we identified 510 windows as outliers including 12.75 Mb or 3.1% of the genome in total and  
516 representing 123 contiguous regions. None of the windows from either comparison overlap the  
517 peak of differentiation between standard and intensive treatment populations on chromosome  
518 5. We note that the Z chromosome was particularly enriched for windows with extreme XP-EHH  
519 scores, containing almost half of those found genome-wide (5.325 Mb). This could be a technical  
520 artefact caused by difficulty in mapping to a highly repetitive chromosome [54], or due to the  
521 smaller average population size or a stronger effect of selection on recessive alleles when  
522 hemizygous. There are also a number of reasons to expect sex-linked genes to frequently be  
523 under selection [80]. An increased variance in XP-EHH scores is apparent specifically in the Z-  
524 specific region (Fig. 6) of the assembly scaffold representing the Z chromosome [54]. This region  
525 is not more repetitive than the autosomes or the pseudo-autosomal region shared by Z and W  
526 [see table S12 of 54], but is at lower copy number in the population as it is present in a single  
527 copy in female worms, so we suspect this enrichment of extreme XP-EHH scores represents a  
528 population genetic effect rather than a technical artefact.

529

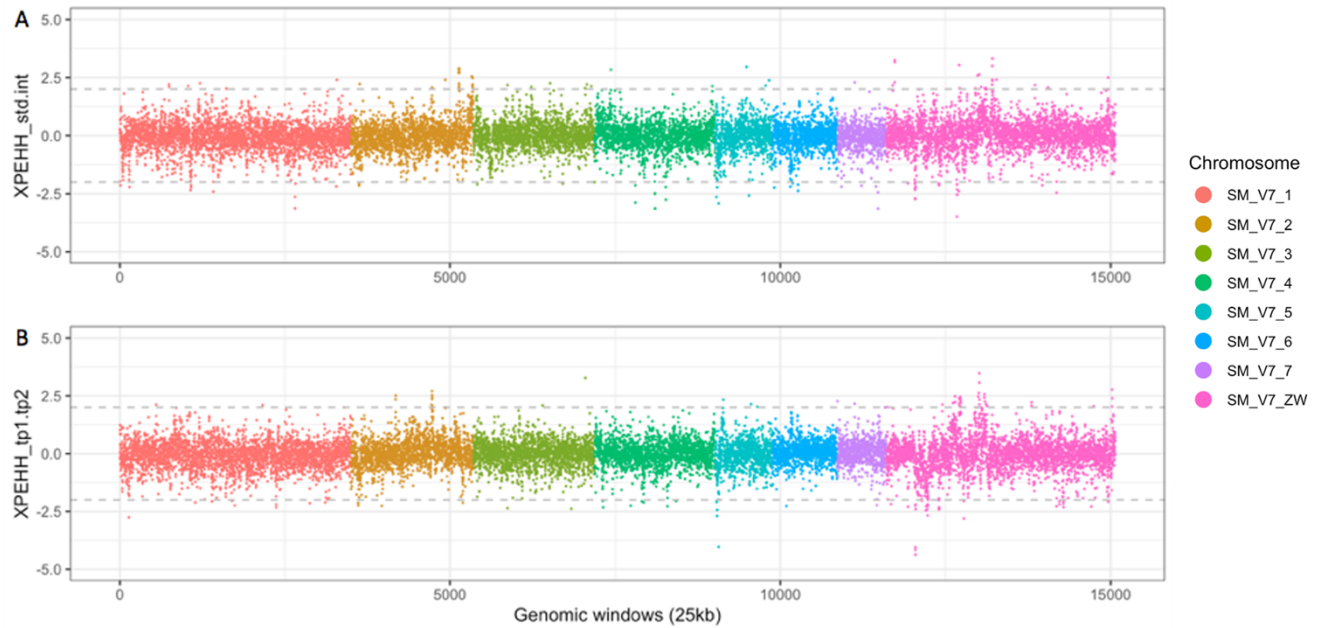

530

531 **Fig 6. XP-EHH coloured by chromosome among treatment groups.** A. Comparison between standard and  
532 intensive treatment groups. B. Comparison between pre-treatment and post-treatment groups. Positive  
533 values in panel A represent windows under stronger selective pressure in annual vs quarterly treatment  
534 arms. In panel B, positive values represent windows under stronger selection in pre-treatment than post-  
535 treatment samples.

536

537 There were 107 genes overlapping the outlier windows in the post-treatment samples, which  
538 were enriched for genes associated with seventeen GO terms for molecular function and  
539 biological processes (S3 table; <https://biit.cs.ut.ee/gplink/l/wWE3Rp-ASq>)<sup>55</sup>. Only 53 of these  
540 genes were on autosomes (leaving 54 on the Z and/or W chromosomes), and no GO terms were  
541 enriched when considering just the autosomal gene subset. No statistically significant  
542 enrichment for any functional category was observed among the genes undergoing stronger  
543 selection in pre-treatment individuals. Functional profiling showed that the 132 genes (78  
544 autosomal) under stronger selection in the intensive arm were significantly enriched for

545 association with 10 GO terms (S3 table; <https://biit.cs.ut.ee/gplink/l/1VaAMWpxQK>)<sup>55</sup>, which  
546 remained enriched in the autosomal subset. 88 genes were found in 46 autosomal windows with  
547 extreme XP-EHH values suggestive of stronger selection in the standard treatment arm include a  
548 pair of adjacent closely related genes likely to be a recent tandem duplication and possessing  
549 nucleoside deaminase activity on chromosome 4; these genes represent the only significantly  
550 enriched GO terms in this comparison (S3 table; <https://biit.cs.ut.ee/gplink/l/4Fz7ZA3hTC>).

551

### 552 **Individual egg reduction rate phenotypes**

553 In an attempt to identify a phenotype for drug efficacy, we estimated the egg reduction rate  
554 (ERR) for 88 individuals for which genomic data was available and that had Kato-Katz egg counts  
555 taken both before and after treatment using a Bayesian linear mixed-effect model [78] that has  
556 previously been used to assess praziquantel efficacy [9, 81]. Previous analysis revealed a lower  
557 but not significant ERR in the intensive arm than the standard arm [10]. Similarly, we observe  
558 lower marginal ERR in samples collected in intensive than standard treatment villages, but with  
559 largely overlapping posterior distributions (Fig. 7B), and while villages vary in ERR (Fig. 7C), there  
560 were similar numbers of high- and low-clearance villages in the two arms. These differences were  
561 largely driven by a small number of individuals in some villages with very low (even negative -  
562 implying a higher egg count after treatment than before) ERR values (Fig. 7A). Unlike in a previous  
563 study [9], no ERRs were significantly below the 90% threshold, probably because only duplicate  
564 counts were available before and after treatment here, so there was significantly less information  
565 to estimate ERR on a per-individual basis.

566

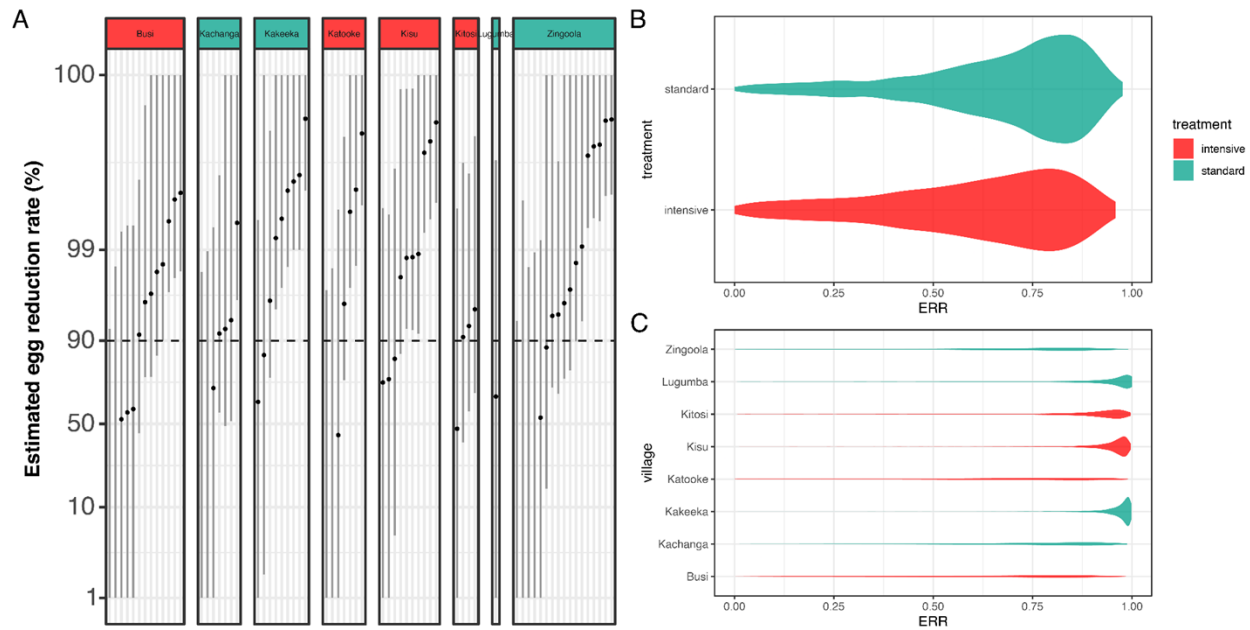

567

568 **Fig 7. Egg reduction rate (ERR) estimates.** (A) Posterior distributions of ERR for each individual for which  
569 pre- and post- egg count data were available. Lines indicate the 95% credible intervals (highest posterior  
570 density intervals) for each estimate, dots are the mean of the posterior distribution. Individuals are shown  
571 on an individual panel for each village, with panel headers coloured by treatment arm. Posterior  
572 distribution of average ERRs stratified by (B) treatment arm and (C) school were constructed by  
573 marginalizing over the fixed- and random-effects coefficients of the generalised linear mixed model.

574

575 Despite the small sample size, we attempted to identify genetic variants associated with  
576 differences in ERR, testing the 6.95 million high-quality SNPs found on the 7 autosomes or on the  
577 shared ZW scaffold. The smallest p-value for any SNP was  $2.7 \times 10^{-9}$ , which after adjustment for  
578 multiple testing represents an adjusted p-value of 0.01841 (S3a Fig). There was some evidence  
579 that p-values are systematically biased in this analysis (S3b Fig). Correcting for population  
580 structure based on PCA coordinates removed the significance of hits (lowest p-value =  $2.7 \times 10^{-8}$ ;  
581 adjusted p-value = 0.179). The most significant hit (SM\_V7\_5:18325957) is intergenic, 886 bp



582 upstream of an annotated protein-coding gene (Smp\_314670) about which has no annotated  
583 domains or functional information are available. We thus conclude that there is no strong  
584 evidence linking any individual genetic variant in these data to variation in estimated ERR.

585

## 586 **Discussion**

587 Schistosomiasis is second only to malaria in socio-economic impact among parasitic causes of  
588 morbidity and mortality [82-84]. MDA is the main method for schistosomiasis control, and there  
589 is currently an effort to expand the coverage of community-wide drug treatment to improve  
590 morbidity control [85] and address the persistence of schistosomiasis in some areas despite many  
591 years of PZQ distribution [86]. Understanding whether intensive treatment for individuals living  
592 in high transmission communities has an impact on parasite populations, potentially leading to  
593 drug resistance is of high importance for public health among schistosomiasis endemic  
594 communities in Africa. Determining the genetic basis of any drug resistance that does emerge is  
595 also crucial for tracking the spread of resistance through schistosome populations and for future  
596 drug or vaccine development designed to circumvent resistance as has been demonstrated for  
597 oxamniquine resistance [87].

598

599 Here, we have taken advantage of a large-scale trial in which the entire communities of 26 fishing  
600 villages were regularly treated with PZQ. A number of features of the study made this an ideal  
601 place to detect an effect of PZQ treatment on parasite populations. Villages were assigned  
602 randomly to treatment arms, so treatment frequency was independent of morbidity, parasite  
603 prevalence or intensity. Treatment was given under direct observation, avoiding issues with drug

604 compliance reported in other studies [5]. The four week follow-up interval post-treatment would  
605 minimise the possibility of diagnosing newly acquired infection after treatment based on the  
606 development time of *S. mansoni* [88], as a new infection would take longer than four weeks to  
607 result in egg production that could be detected by Kato Katz and microscopy [89]. The exception  
608 would be if, during the time of treatment, a patient had juvenile worms as these would not have  
609 been cleared by treatment [90]. We expected that as the study was based on a group of islands  
610 it might help isolate the parasite population and so allow us to detect drug-induced selection in  
611 this population without the confounding effect of high levels of gene flow from untreated  
612 populations. Only individuals who had lived in these villages for at least three years were included  
613 in the study to control for absenteeism and MDA compliance although it was still not possible to  
614 control for movement between villages and islands given that fishing is the main economic  
615 activity within these communities.

616

617 The population of parasites present on the islands is closely related to that recently described  
618 from communities on the shoreline of Lake Victoria, and as expected rather divergent from that  
619 inland from the lake (Figs 2A & B) [55]. This presumably reflects greater movement of people  
620 between the shoreline and island than with the inland populations, as well as that the inland  
621 population included here is further (approximately 160 km) from the shoreline than are the  
622 islands (approximately 80 km). We see little genetic differentiation between villages on the same  
623 island, as fishing villages are close to one another (1-13 km apart) and movement may be  
624 frequent among fishermen and village communities. Less expected was that we see little or no  
625 genetic differentiation between islands, with only a weak trend for greater genetic differentiation

626 between villages on different islands than villages on the same island, albeit this is a larger effect  
627 than either the distance between villages or the size of village populations, perhaps suggesting  
628 that snail vector movement around the coasts of islands may play a role in parasite movement.  
629 The islands are separated by water that is deep enough [91] (primary data at  
630 <http://dataverse.harvard.edu/dataverse/LakeVicFish>) to prevent snails moving actively from one  
631 island to the next, but parasites could travel through movement of infected people or through  
632 infected snails being carried on fishermen's or conceivably by rafting on floating plants such as  
633 water hyacinth. Geographical conditions on these islands are similar except for Lugumba Island  
634 which has more rocky/stony shores compared to Koome and Damba which have more sandy  
635 shores and more vegetation, so we would expect snails to be able to establish similarly at most  
636 locations.

637  
638 Despite seeing little or no genetic structure in the island parasite population, we see some  
639 evidence that PZQ treatment has had a small effect on the genetic diversity of the parasite  
640 population in this area. While we do not have baseline samples from before any PZQ treatment  
641 was administered as part of the LaVIISWA trial, we see very slightly higher genome-wide genetic  
642 diversity in the standard treatment arm than in the intensive arm, as would be expected if  
643 intensive treatment has been more effective at reducing the parasite population than the  
644 standard treatment regimen [10], although the effect we observe is very small and so maybe of  
645 limited biological relevance. Differences in the same direction were present when comparing  
646 subsets of samples taken before and after treatment separately, and was more pronounced in  
647 the post-treatment populations. As we see only very few closely related parasites, and no

648 significant enrichment in relatedness based on treatment arm or sampling time with respect to  
649 treatment, it seems that this effect is unlikely to be due to differences in the number of directly  
650 related miracidia. We observe little or no genetic differentiation between villages in the two  
651 study arms, and only very slightly higher differentiation between the arms in post-treatment than  
652 in pre-treatment samples.

653

654 Evidence that PZQ treatment has some effect on the parasite population led us to investigate  
655 whether particular variants might be related to exposure to PZQ and so potentially responsible  
656 for any reduced susceptibility of parasites to PZQ within MDA programs [9]. We identify several  
657 regions within the genome that were highly differentiated between samples from the standard  
658 and intensive arms of the study, including a particularly striking region on chromosome 5 that  
659 showed high differentiation between post-treatment samples from the two arms of the study.  
660 This region contained a number of genes with functions that could be potentially linked to PZQ  
661 drug action. These include an ATP-binding cassette (ABC) transporter-associated gene  
662 (Smp\_136310) that has previously been linked to helminth detoxification and drug resistance  
663 processes [92]. A gene with calcium dependent/modulatory functions (Smp\_347070) was also  
664 found in the enriched region on chromosome 5, which is of interest given that the mode of action  
665 of PZQ has long been linked to increased permeability of the cell membrane to calcium ions into  
666 the cells which then causes contraction, paralysis and eventual death of the worms [93]. We also  
667 investigated regions of the genome under different selective regimes either with treatment  
668 intensity or when comparing pre- and post-treatment samples. Among the genes under varying  
669 selection were purine-nucleoside phosphorylase activity associated genes (Smp\_197110 and

670 Smp\_171620) which are involved in the nucleotide salvage pathway of *S. mansoni*. Given that *S.*  
671 *mansoni* depends entirely on the salvage pathway for its purine metabolism [94], there is a  
672 possibility that ongoing non-random selection within this gene might affect parasite metabolic  
673 processes and a potential future drug target. However, we note that many biological processes  
674 could be contributing to genetic variation between samples from natural populations apart from  
675 variation in drug susceptibility [95]. While this study has shed some light on possible drug  
676 resistance genetic markers, other approaches, such as genetic crosses between parasites [96, 97]  
677 from natural populations that vary in drug efficacy or from lines selected for resistance [21, 87],  
678 are likely to have more power to reveal the genetics of drug resistance and so enable more  
679 focused studies of the effect on treatment on parasite populations.

680  
681 A limitation in this study was that we did not have parasite populations sampled several years  
682 apart since it has been observed in similar studies that differentiation occurs over time in a given  
683 community [38], so sampling over a longer time-span could provide stronger evidence of genetic  
684 change in the population. In particular, we would ideally have access to baseline samples from  
685 the same population taken prior to any large-scale PZQ treatment being administered. Despite  
686 the falling cost and rising throughput of nucleic acid sequencing, we were limited in the number  
687 of miracidia that we could sequence in this study. An additional limitation is the labour-intensive  
688 process of hatching and washing miracidia necessary to obtain high-quality data due to the non-  
689 selective nature of the whole-genome sequencing approach [67].

690  
691 As control programmes expand and reduce pathogen populations, we would expect the genetic

692 diversity of these populations to fall to reflect the reduced population size [13, 41, 98], and drug  
693 resistance to be reflected in particular genotypes being over-represented in samples collected  
694 after large-scale treatment has been applied. As in other recent studies [42, 55], we find evidence  
695 of at best a very limited effect of PZQ treatment on schistosome populations either post-  
696 treatment or over a longer time frame of intensive treatment. In most previous studies, extensive  
697 refugia from treatment have been present in the community, as only school-age children are  
698 routinely treated in most areas, so it is instructive that we find similar results in this study despite  
699 community-wide treatment. While there is some evidence for reduced efficacy of PZQ in Uganda  
700 [9], most studies do not find a significant effect [11], including one study based on the same  
701 population as studied here [10]. Even in the absence of drug resistance emerging in natural  
702 populations, high-resolution genetic surveillance of African schistosome populations is ideally  
703 suited to detect changes in parasite population structure related to the impact of control  
704 measures [30], and could ultimately inform approaches to eliminate schistosome morbidity in  
705 remaining 'hot-spots' by helping us understand parasite transmission between hosts and  
706 between foci [86].

707

708 In summary, We demonstrate a small but significant effect of both short-term PZQ treatment  
709 intensity and a recent treatment episode on genome wide-diversity in a schistosome. This  
710 reduction in diversity does not appear to be associated with enrichment of closely related  
711 parasites, but rather could reflect ongoing non-random recent selection within these fishing  
712 communities in Uganda that might be under the influence of continued mass drug  
713 administration. We identify genomic windows that are either particularly differentiated following

714 treatment or appear to be under differing selective regimes with different treatment intensity.

715 These regions could include genes involved in drug response, but additional data is needed to

716 prioritise candidates for further investigation.

717

718

719 **Acknowledgements**

720 We thank the Cure Rates study team and participants, the Wellcome Sanger Institute sequencing  
721 team, and members of the Parasite Genomics group and Pathogen Informatics team in the  
722 Parasites and Microbes Programme at the Sanger Institute. For the purpose of Open Access, the  
723 authors have applied a CC BY public copyright licence to any Author Accepted Manuscript version  
724 arising from this submission.

725 **Funding:** This work was funded by the Wellcome Trust [grants 206194 and 095778].

726

727 **Conflict of interest:** The authors declare that there are no conflicts of interest.

728



729

## 730 **References**

- 731 1. Sandbach FR. The history of schistosomiasis research and policy for its control. *Med Hist.*  
732 1976;20(3):259-75.
- 733 2. Hotez PJ, Alvarado M, Basanez MG, Bolliger I, Bourne R, Boussinesq M, et al. The global  
734 burden of disease study 2010: interpretation and implications for the neglected tropical  
735 diseases. *PLoS Negl Trop Dis.* 2014;8(7):e2865.
- 736 3. Kabatereine NB, Brooker S, Koukounari A, Kazibwe F, Tukahebwa EM, Fleming FM, et al.  
737 Impact of a national helminth control programme on infection and morbidity in Ugandan  
738 schoolchildren. *Bull World Health Organ.* 2007;85(2):91-9.
- 739 4. Blanton RE, Blank WA, Costa JM, Carmo TM, Reis EA, Silva LK, et al. *Schistosoma*  
740 *mansoni* population structure and persistence after praziquantel treatment in two villages of  
741 Bahia, Brazil. *Int J Parasitol.* 2011;41(10):1093-9.
- 742 5. Adriko M, Faust CL, Carruthers LV, Moses A, Tukahebwa EM, Lamberton PHL. Low  
743 Praziquantel Treatment Coverage for *Schistosoma mansoni* in Mayuge District, Uganda, Due to  
744 the Absence of Treatment Opportunities, Rather Than Systematic Non-Compliance. *Trop Med*  
745 *Infect Dis.* 2018;3(4).
- 746 6. Krauth SJ, Balen J, Gobert GN, Lamberton PHL. A Call for Systems Epidemiology to Tackle  
747 the Complexity of Schistosomiasis, Its Control, and Its Elimination. *Trop Med Infect Dis.*  
748 2019;4(1).
- 749 7. Sanya RE, Tumwesige E, Elliott AM, Seeley J. Perceptions about interventions to control

- 750 schistosomiasis among the Lake Victoria island communities of Koome, Uganda. *PLoS Negl Trop*  
751 *Dis.* 2017;11(10):e0005982.
- 752 8. Ending the neglect to attain the Sustainable Development Goals: a road map for  
753 neglected tropical diseases 2021–20302020.
- 754 9. Crellen T, Walker M, Lamberton PH, Kabatereine NB, Tukahebwa EM, Cotton JA, et al.  
755 Reduced Efficacy of Praziquantel Against *Schistosoma mansoni* Is Associated With Multiple  
756 Rounds of Mass Drug Administration. *Clin Infect Dis.* 2016;63(9):1151-9.
- 757 10. Tushabe JV, Lubyayi L, Sserubanja J, Kabuubi P, Abayo E, Kiwanuka S, et al. Does  
758 Intensive Treatment Select for Praziquantel Resistance in High-Transmission Settings?  
759 Parasitological Trends and Treatment Efficacy Within a Cluster-Randomized Trial. *Open Forum*  
760 *Infect Dis.* 2020;7(4):ofaa091.
- 761 11. Fukushige M, Chase-Topping M, Woolhouse MEJ, Mutapi F. Efficacy of praziquantel has  
762 been maintained over four decades (from 1977 to 2018): A systematic review and meta-  
763 analysis of factors influence its efficacy. *PLoS Negl Trop Dis.* 2021;15(3):e0009189.
- 764 12. Mutapi F, Maizels R, Fenwick A, Woolhouse M. Human schistosomiasis in the post mass  
765 drug administration era. *Lancet Infect Dis.* 2017;17(2):e42-e8.
- 766 13. Coeli R, Baba EH, Araujo N, Coelho PM, Oliveira G. Praziquantel treatment decreases  
767 *Schistosoma mansoni* genetic diversity in experimental infections. *PLoS Negl Trop Dis.*  
768 2013;7(12):e2596.
- 769 14. Fallon PG, Sturrock RF, Niang AC, Doenhoff MJ. Short report: diminished susceptibility to  
770 praziquantel in a Senegal isolate of *Schistosoma mansoni*. *Am J Trop Med Hyg.* 1995;53(1):61-2.
- 771 15. Lotfy WM, Hishmat MG, El Nashar AS, Abu El Einin HM. Evaluation of a method for

- 772 induction of praziquantel resistance in *Schistosoma mansoni*. *Pharm Biol.* 2015;53(8):1214-9.
- 773 16. Messerli SM, Kasinathan RS, Morgan W, Spranger S, Greenberg RM. *Schistosoma*  
774 *mansoni* P-glycoprotein levels increase in response to praziquantel exposure and correlate with  
775 reduced praziquantel susceptibility. *Mol Biochem Parasitol.* 2009;167(1):54-9.
- 776 17. Pinto-Almeida A, Mendes T, de Oliveira RN, Correa Sde A, Allegretti SM, Belo S, et al.  
777 Morphological Characteristics of *Schistosoma mansoni* PZQ-Resistant and -Susceptible Strains  
778 Are Different in Presence of Praziquantel. *Front Microbiol.* 2016;7:594.
- 779 18. Blanton RE. Population Structure and Dynamics of Helminthic Infection: Schistosomiasis.  
780 *Microbiol Spectr.* 2019;7(4).
- 781 19. Vale N, Gouveia MJ, Rinaldi G, Brindley PJ, Gartner F, Correia da Costa JM. Praziquantel  
782 for Schistosomiasis: Single-Drug Metabolism Revisited, Mode of Action, and Resistance.  
783 *Antimicrob Agents Chemother.* 2017;61(5).
- 784 20. Park SK, Gunaratne GS, Chulkov EG, Moehring F, McCusker P, Dosa PI, et al. The  
785 anthelmintic drug praziquantel activates a schistosome transient receptor potential channel. *J*  
786 *Biol Chem.* 2019;294(49):18873-80.
- 787 21. Le Clec'h W, Chevalier FD, Mattos ACA, Strickland A, Diaz R, McDew-White M, et al.  
788 Genetic analysis of praziquantel response in schistosome parasites implicates a transient  
789 receptor potential channel. *Sci Transl Med.* 2021;13(625):eabj9114.
- 790 22. Webster JP, Neves MI, Webster BL, Pennance T, Rabone M, Gouvras AN, et al. Parasite  
791 Population Genetic Contributions to the Schistosomiasis Consortium for Operational Research  
792 and Evaluation within Sub-Saharan Africa. *Am J Trop Med Hyg.* 2020;103(1\_Suppl):80-91.
- 793 23. Betson M, Sousa-Figueiredo JC, Kabatereine NB, Stothard JR. New insights into the

- 794 molecular epidemiology and population genetics of *Schistosoma mansoni* in Ugandan pre-  
795 school children and mothers. *PLoS Negl Trop Dis*. 2013;7(12):e2561.
- 796 24. Webster BL, Webster JP, Gouvras AN, Garba A, Lamine MS, Diaw OT, et al. DNA  
797 'barcoding' of *Schistosoma mansoni* across sub-Saharan Africa supports substantial within  
798 locality diversity and geographical separation of genotypes. *Acta Trop*. 2013;128(2):250-60.
- 799 25. Blair L, Webster JP, Barker GC. Isolation and characterization of polymorphic  
800 microsatellite markers in *Schistosoma mansoni* from Africa. *Mol Ecol Notes*. 2001;1:93-5.
- 801 26. Curtis J, Sorensen RE, Page LK, Minchella DJ. Microsatellite loci in the human blood fluke  
802 *Schistosoma mansoni* and their utility for other schistosome species. *Mol Ecol Notes*.  
803 2001;1:143-5.
- 804 27. Durand P, Sire C, Theron A. Isolation of microsatellite markers in the digenetic  
805 trematode *Schistosoma mansoni* from Guadeloupe island. *Mol Ecol*. 2000;9(7):997-8.
- 806 28. Golan R, Gower CM, Emery AM, Rollinson D, Webster JP. Isolation and characterization  
807 of the first polymorphic microsatellite markers for *Schistosoma haematobium* and their  
808 application in multiplex reactions of larval stages. *Mol Ecol Resour*. 2008;8:647-9.
- 809 29. Rudge JW, Carabin H, Balolong E, Tallo V, Shrivastava J, Lu DB, et al. Population genetics  
810 of *Schistosoma japonicum* within the Philippines suggest high levels of transmission between  
811 humans and dogs. *PLoS Negl Trop Dis*. 2008;2(11):e340.
- 812 30. Gower CM, Gouvras AN, Lamberton PH, Deol A, Shrivastava J, Mutombo PN, et al.  
813 Population genetic structure of *Schistosoma mansoni* and *Schistosoma haematobium* from  
814 across six sub-Saharan African countries: implications for epidemiology, evolution and control.  
815 *Acta Trop*. 2013;128(2):261-74.

- 816 31. Gower CM, Shrivastava J, Lamberton PH, Rollinson D, Webster BL, Emery A, et al.  
817 Development and application of an ethically and epidemiologically advantageous assay for the  
818 multi-locus microsatellite analysis of *Schistosoma mansoni*. *Parasitology*. 2007;134(Pt 4):523-  
819 36.
- 820 32. Lawton SP, Hirai H, Ironside JE, Johnston DA, Rollinson D. Genomes and geography:  
821 genomic insights into the evolution and phylogeography of the genus *Schistosoma*. *Parasit*  
822 *Vectors*. 2011;4:131.
- 823 33. Blank WA, Reis EA, Thiong'o FW, Braghiroli JF, Santos JM, Melo PR, et al. Analysis of  
824 *Schistosoma mansoni* population structure using total fecal egg sampling. *J Parasitol*.  
825 2009;95(4):881-9.
- 826 34. Thiele EA, Sorensen RE, Gazzinelli A, Minchella DJ. Genetic diversity and population  
827 structuring of *Schistosoma mansoni* in a Brazilian village. *Int J Parasitol*. 2008;38(3-4):389-99.
- 828 35. Van den Broeck F, Maes GE, Larmuseau MH, Rollinson D, Sy I, Faye D, et al.  
829 Reconstructing Colonization Dynamics of the Human Parasite *Schistosoma mansoni* following  
830 Anthropogenic Environmental Changes in Northwest Senegal. *PLoS Negl Trop Dis*.  
831 2015;9(8):e0003998.
- 832 36. Rey O, Webster BL, Huyse T, Rollinson D, Van den Broeck F, Kincaid-Smith J, et al.  
833 Population genetics of African *Schistosoma* species. *Infect Genet Evol*. 2021;89:104727.
- 834 37. Neves MI, Gower CM, Webster JP, Walker M. Revisiting density-dependent fecundity in  
835 schistosomes using sibship reconstruction. *PLoS Negl Trop Dis*. 2021;15(5):e0009396.
- 836 38. Norton AJ, Gower CM, Lamberton PH, Webster BL, Lwambo NJ, Blair L, et al. Genetic  
837 consequences of mass human chemotherapy for *Schistosoma mansoni*: population structure

- 838 pre- and post-praziquantel treatment in Tanzania. *Am J Trop Med Hyg.* 2010;83(4):951-7.
- 839 39. French MD, Churcher TS, Gambhir M, Fenwick A, Webster JP, Kabatereine NB, et al.  
840 Observed reductions in *Schistosoma mansoni* transmission from large-scale administration of  
841 praziquantel in Uganda: a mathematical modelling study. *PLoS Negl Trop Dis.* 2010;4(11):e897.
- 842 40. Lelo AE, Mburu DN, Magoma GN, Mungai BN, Kihara JH, Mwangi IN, et al. No apparent  
843 reduction in schistosome burden or genetic diversity following four years of school-based mass  
844 drug administration in mwea, central kenya, a heavy transmission area. *PLoS Negl Trop Dis.*  
845 2014;8(10):e3221.
- 846 41. Gower CM, Gehre F, Marques SR, Lamberton PHL, Lwambo NJ, Webster JP. Phenotypic  
847 and genotypic monitoring of *Schistosoma mansoni* in Tanzanian schoolchildren five years into a  
848 preventative chemotherapy national control programme. *Parasit Vectors.* 2017;10(1):593.
- 849 42. Faust CL, Crotti M, Moses A, Oguttu D, Wamboko A, Adriko M, et al. Two-year  
850 longitudinal survey reveals high genetic diversity of *Schistosoma mansoni* with adult worms  
851 surviving praziquantel treatment at the start of mass drug administration in Uganda. *Parasit*  
852 *Vectors.* 2019;12(1):607.
- 853 43. Le Clec'h W, Chevalier FD, McDew-White M, Allan F, Webster BL, Gouvras AN, et al.  
854 Whole genome amplification and exome sequencing of archived schistosome miracidia.  
855 *Parasitology.* 2018;145(13):1739-47.
- 856 44. Platt RN, McDew-White M, Le Clec'h W, Chevalier FD, Allan F, Emery AM, et al. Ancient  
857 Hybridization and Adaptive Introgression of an Invadysin Gene in Schistosome Parasites. *Mol*  
858 *Biol Evol.* 2019;36(10):2127-42.
- 859 45. Platt RN, Le Clec'h W, Chevalier FD, McDew-White M, LoVerde P, de Assis RR, et al.

- 860 Genomic analysis of a parasite invasion: colonization of the Americas by the blood fluke,  
861 *Schistosoma mansoni*. bioRxiv. 2021:465783.
- 862 46. Shortt JA, Card DC, Schield DR, Liu Y, Zhong B, Castoe TA, et al. Whole Genome  
863 Amplification and Reduced-Representation Genome Sequencing of *Schistosoma japonicum*  
864 Miracidia. PLoS Negl Trop Dis. 2017;11(1):e0005292.
- 865 47. Shortt JA, Timm LE, Hales NR, Nikolakis ZL, Schield DR, Perry BW, et al. Population  
866 genomic analyses of schistosome parasites highlight critical challenges facing endgame  
867 elimination efforts. Sci Rep. 2021;11(1):6884.
- 868 48. Protasio AV, Tsai IJ, Babbage A, Nichol S, Hunt M, Aslett MA, et al. A systematically  
869 improved high quality genome and transcriptome of the human blood fluke *Schistosoma*  
870 *mansoni*. PLoS Negl Trop Dis. 2012;6(1):e1455.
- 871 49. Oey H, Zakrzewski M, Gravermann K, Young ND, Korhonen PK, Gobert GN, et al. Whole-  
872 genome sequence of the bovine blood fluke *Schistosoma bovis* supports interspecific  
873 hybridization with *S. haematobium*. PLoS Pathog. 2019;15(1):e1007513.
- 874 50. Stroehlein AJ, Korhonen PK, Chong TM, Lim YL, Chan KG, Webster B, et al. High-quality  
875 *Schistosoma haematobium* genome achieved by single-molecule and long-range sequencing.  
876 Gigascience. 2019;8(9).
- 877 51. Luo F, Yin M, Mo X, Sun C, Wu Q, Zhu B, et al. An improved genome assembly of the  
878 fluke *Schistosoma japonicum*. PLoS Negl Trop Dis. 2019;13(8):e0007612.
- 879 52. International Helminth Genomes C. Comparative genomics of the major parasitic  
880 worms. Nat Genet. 2019;51(1):163-74.
- 881 53. Kincaid-Smith J, Tracey A, de Carvalho Augusto R, Bulla I, Holroyd N, Rognon A, et al.

- 882 Morphological and genomic characterisation of the *Schistosoma* hybrid infecting humans in  
883 Europe reveals admixture between *Schistosoma haematobium* and *Schistosoma bovis*. PLoS  
884 Negl Trop Dis. 2021;15(12):e0010062.
- 885 54. Buddenborg SK, Tracey A, Berger DJ, Lu Z, Doyle SR, Fu B, et al. Assembled  
886 chromosomes of the blood fluke *Schistosoma mansoni* provide insight into the evolution of its  
887 ZW sex-determination system. bioRxiv. 2021:456314.
- 888 55. Berger DJ, Crellen T, Lamberton PHL, Allan F, Tracey A, Noonan JD, et al. Whole-genome  
889 sequencing of *Schistosoma mansoni* reveals extensive diversity with limited selection despite  
890 mass drug administration. Nat Commun. 2021;12(1):4776.
- 891 56. Young ND, Chan KG, Korhonen PK, Min Chong T, Ee R, Mohandas N, et al. Exploring  
892 molecular variation in *Schistosoma japonicum* in China. Sci Rep. 2015;5:17345.
- 893 57. Crellen T, Allan F, David S, Durrant C, Huckvale T, Holroyd N, et al. Whole genome  
894 resequencing of the human parasite *Schistosoma mansoni* reveals population history and  
895 effects of selection. Sci Rep. 2016;6:20954.
- 896 58. Nikolakis ZL, Hales NR, Perry BW, Schield DR, Timm LE, Liu Y, et al. Patterns of  
897 relatedness and genetic diversity inferred from whole genome sequencing of archival blood  
898 fluke miracidia (*Schistosoma japonicum*). PLoS Negl Trop Dis. 2021;15(1):e0009020.
- 899 59. Shetty AC, Jacob CG, Huang F, Li Y, Agrawal S, Saunders DL, et al. Genomic structure and  
900 diversity of *Plasmodium falciparum* in Southeast Asia reveal recent parasite migration patterns.  
901 Nat Commun. 2019;10(1):2665.
- 902 60. Taylor AR, Schaffner SF, Cerqueira GC, Nkhoma SC, Anderson TJC, Sriprawat K, et al.  
903 Quantifying connectivity between local *Plasmodium falciparum* malaria parasite populations



- 904 using identity by descent. *PLoS Genet.* 2017;13(10):e1007065.
- 905 61. MalariaGen, Ahouidi A, Ali M, Almagro-Garcia J, Amambua-Ngwa A, Amaratunga C, et al.  
906 An open dataset of *Plasmodium falciparum* genome variation in 7,000 worldwide samples.  
907 *Wellcome Open Res.* 2021;6:42.
- 908 62. Nampijja M, Webb EL, Kaweesa J, Kizindo R, Namutebi M, Nakazibwe E, et al. The Lake  
909 Victoria Island Intervention Study on Worms and Allergy-related diseases (LaVIISWA): study  
910 protocol for a randomised controlled trial. *Trials.* 2015;16:187.
- 911 63. Sanya RE, Nkurunungi G, Hoek Spaans R, Nampijja M, O'Hara G, Kizindo R, et al. The  
912 Impact of Intensive Versus Standard Anthelmintic Treatment on Allergy-related Outcomes,  
913 Helminth Infection Intensity, and Helminth-related Morbidity in Lake Victoria Fishing  
914 Communities, Uganda: Results From the LaVIISWA Cluster-randomized Trial. *Clin Infect Dis.*  
915 2019;68(10):1665-74.
- 916 64. Munisi DZ, Buza J, Mpolya EA, Angelo T, Kinung'hi SM. The Efficacy of Single-Dose versus  
917 Double-Dose Praziquantel Treatments on *Schistosoma mansoni* Infections: Its Implication on  
918 Undernutrition and Anaemia among Primary Schoolchildren in Two On-Shore Communities,  
919 Northwestern Tanzania. *Biomed Res Int.* 2017;2017:7035025.
- 920 65. Kittur N, Binder S, Campbell CH, King CH, Kinung'hi S, Olsen A, et al. Defining Persistent  
921 Hotspots: Areas That Fail to Decrease Meaningfully in Prevalence after Multiple Years of Mass  
922 Drug Administration with Praziquantel for Control of Schistosomiasis. *Am J Trop Med Hyg.*  
923 2017;97(6):1810-7.
- 924 66. Pitchford RJ, Visser PS. A simple and rapid technique for quantitative estimation of  
925 helminth eggs in human and animal excreta with special reference to *Schistosoma* sp. *Trans R*

- 926 Soc Trop Med Hyg. 1975;69(3):318-22.
- 927 67. Doyle SR, Sankaranarayanan G, Allan F, Berger D, Jimenez Castro PD, Collins JB, et al.  
928 Evaluation of DNA Extraction Methods on Individual Helminth Egg and Larval Stages for Whole-  
929 Genome Sequencing. *Front Genet.* 2019;10:826.
- 930 68. Lee-Six H, Olafsson S, Ellis P, Osborne RJ, Sanders MA, Moore L, et al. The landscape of  
931 somatic mutation in normal colorectal epithelial cells. *Nature.* 2019;574(7779):532-7.
- 932 69. Picard toolkit. Broad Institute; 2018.
- 933 70. Danecek P, Auton A, Abecasis G, Albers CA, Banks E, DePristo MA, et al. The variant call  
934 format and VCFtools. *Bioinformatics.* 2011;27(15):2156-8.
- 935 71. Kimura M. The number of heterozygous nucleotide sites maintained in a finite  
936 population due to steady flux of mutations. *Genetics.* 1969;61(4):893-903.
- 937 72. Csardi G, Nepusz T. The igraph software package for complex network research.  
938 *InterJournal.* 2006;Complex Systems:1695.
- 939 73. Sabeti PC, Varilly P, Fry B, Lohmueller J, Hostetter E, Cotsapas C, et al. Genome-wide  
940 detection and characterization of positive selection in human populations. *Nature.*  
941 2007;449(7164):913-8.
- 942 74. Criscione CD, Valentim CL, Hirai H, LoVerde PT, Anderson TJ. Genomic linkage map of  
943 the human blood fluke *Schistosoma mansoni*. *Genome Biol.* 2009;10(6):R71.
- 944 75. Browning SR, Browning BL. Rapid and accurate haplotype phasing and missing-data  
945 inference for whole-genome association studies by use of localized haplotype clustering. *Am J*  
946 *Hum Genet.* 2007;81(5):1084-97.
- 947 76. Szpiech ZA, Hernandez RD. selscan: an efficient multithreaded program to perform EHH-

- 948 based scans for positive selection. *Mol Biol Evol.* 2014;31(10):2824-7.
- 949 77. Raudvere U, Kolberg L, Kuzmin I, Arak T, Adler P, Peterson H, et al. g:Profiler: a web  
950 server for functional enrichment analysis and conversions of gene lists (2019 update). *Nucleic*  
951 *Acids Res.* 2019;47(W1):W191-W8.
- 952 78. Walker M, Churcher TS, Basanez MG. Models for measuring anthelmintic drug efficacy  
953 for parasitologists. *Trends Parasitol.* 2014;30(11):528-37.
- 954 79. Chang CC, Chow CC, Tellier LC, Vattikuti S, Purcell SM, Lee JJ. Second-generation PLINK:  
955 rising to the challenge of larger and richer datasets. *Gigascience.* 2015;4:7.
- 956 80. Johnson NA, Lachance J. The genetics of sex chromosomes: evolution and implications  
957 for hybrid incompatibility. *Ann N Y Acad Sci.* 2012;1256:E1-22.
- 958 81. Walker M, Mabud TS, Olliaro PL, Coulibaly JT, King CH, Raso G, et al. New approaches to  
959 measuring anthelmintic drug efficacy: parasitological responses of childhood schistosome  
960 infections to treatment with praziquantel. *Parasit Vectors.* 2016;9:41.
- 961 82. Hotez PJ, Molyneux DH, Fenwick A, Ottesen E, Ehrlich Sachs S, Sachs JD. Incorporating a  
962 rapid-impact package for neglected tropical diseases with programs for HIV/AIDS, tuberculosis,  
963 and malaria. *PLoS Med.* 2006;3(5):e102.
- 964 83. Inobaya MT, Olveda RM, Chau TN, Olveda DU, Ross AG. Prevention and control of  
965 schistosomiasis: a current perspective. *Res Rep Trop Med.* 2014;2014(5):65-75.
- 966 84. Semanya AA, Sullivan JS, Barnwell JW, Secor WE. *Schistosoma mansoni* infection impairs  
967 antimalaria treatment and immune responses of rhesus macaques infected with mosquito-  
968 borne *Plasmodium coatneyi*. *Infect Immun.* 2012;80(11):3821-7.
- 969 85. French MD, Evans D, Fleming FM, Secor WE, Biritwum NK, Brooker SJ, et al.

- 970 Schistosomiasis in Africa: Improving strategies for long-term and sustainable morbidity control.  
971 PLoS Negl Trop Dis. 2018;12(6):e0006484.
- 972 86. Mawa PA, Kincaid-Smith J, Tukahebwa EM, Webster JP, Wilson S. Schistosomiasis  
973 Morbidity Hotspots: Roles of the Human Host, the Parasite and Their Interface in the  
974 Development of Severe Morbidity. Front Immunol. 2021;12:635869.
- 975 87. Valentim CL, Cioli D, Chevalier FD, Cao X, Taylor AB, Holloway SP, et al. Genetic and  
976 molecular basis of drug resistance and species-specific drug action in schistosome parasites.  
977 Science. 2013;342(6164):1385-9.
- 978 88. Colley DG, Bustinduy AL, Secor WE, King CH. Human schistosomiasis. Lancet.  
979 2014;383(9936):2253-64.
- 980 89. Aragon AD, Imani RA, Blackburn VR, Cupit PM, Melman SD, Goronga T, et al. Towards an  
981 understanding of the mechanism of action of praziquantel. Mol Biochem Parasitol.  
982 2009;164(1):57-65.
- 983 90. Xiao SH, Sun J, Chen MG. Pharmacological and immunological effects of praziquantel  
984 against *Schistosoma japonicum*: a scoping review of experimental studies. Infect Dis Poverty.  
985 2018;7(1):9.
- 986 91. Aura CM, Musa S, Nyamweya CS, Ogari Z, Njiru JM, Hamilton SE, et al. A GIS-based  
987 approach for delineating suitable areas for cage fish culture in a lake. Lakes and Reservoirs.  
988 2021;26:e12357.
- 989 92. Kumkate S, Chunchob S, Janvilisri T. Expression of ATP-binding cassette multidrug  
990 transporters in the giant liver fluke *Fasciola gigantica* and their possible involvement in the  
991 transport of bile salts and anthelmintics. Mol Cell Biochem. 2008;317(1-2):77-84.

- 992 93. Doenhoff MJ, Cioli D, Utzinger J. Praziquantel: mechanisms of action, resistance and new  
993 derivatives for schistosomiasis. *Curr Opin Infect Dis.* 2008;21(6):659-67.
- 994 94. de Moraes MC, Cardoso CL, Cass QB. Immobilized purine nucleoside phosphorylase  
995 from *Schistosoma mansoni* for specific inhibition studies. *Anal Bioanal Chem.*  
996 2013;405(14):4871-8.
- 997 95. Doyle SR, Tracey A, Laing R, Holroyd N, Bartley D, Bazant W, et al. Genomic and  
998 transcriptomic variation defines the chromosome-scale assembly of *Haemonchus contortus*, a  
999 model gastrointestinal worm. *Commun Biol.* 2020;3(1):656.
- 1000 96. Doyle SR, Illingworth CJR, Laing R, Bartley DJ, Redman E, Martinelli A, et al. Population  
1001 genomic and evolutionary modelling analyses reveal a single major QTL for ivermectin drug  
1002 resistance in the pathogenic nematode, *Haemonchus contortus*. *BMC Genomics.*  
1003 2019;20(1):218.
- 1004 97. Doyle SR, Laing R, Bartley D, Morrison A, Holroyd N, Maitland K, et al. Genomic  
1005 landscape of drug response reveals novel mediators of anthelmintic resistance. *bioRxiv.*  
1006 2021:465712.
- 1007 98. Cotton JA, Berriman M, Dalen L, Barnes I. Eradication genomics-lessons for parasite  
1008 control. *Science.* 2018;361(6398):130-1.
- 1009
- 1010
- 1011
- 1012

1014 **S1 Figure.** Mean  $F_{ST}$  between all pairs of villages. Shading indicates levels of genetic  
1015 differentiation between pairs of villages indicated on each row and column. Symbol shapes  
1016 reflect pair-wise comparisons of differentiation of populations samples between or within  
1017 islands, and the area of each symbol is proportional to the linear distance between the villages.  
1018

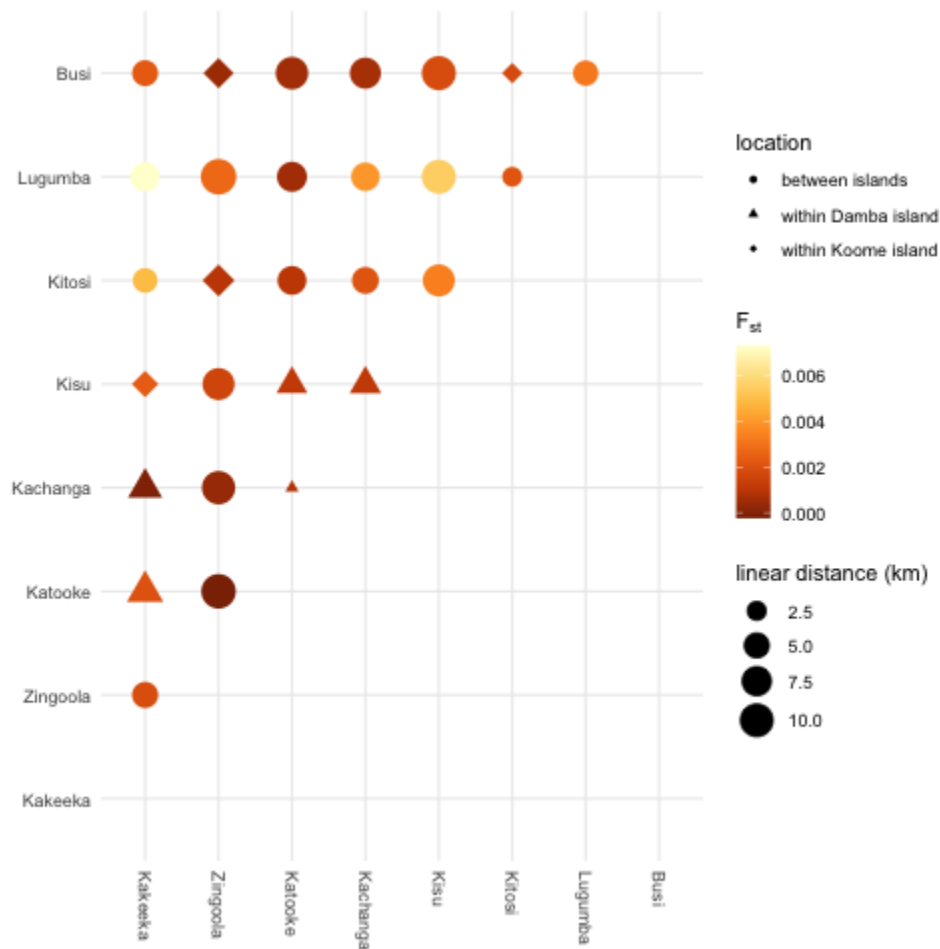

1019

1020

1021

1022 **S2 Figure.** Principal component analysis of population structure by treatment and time point.

1023

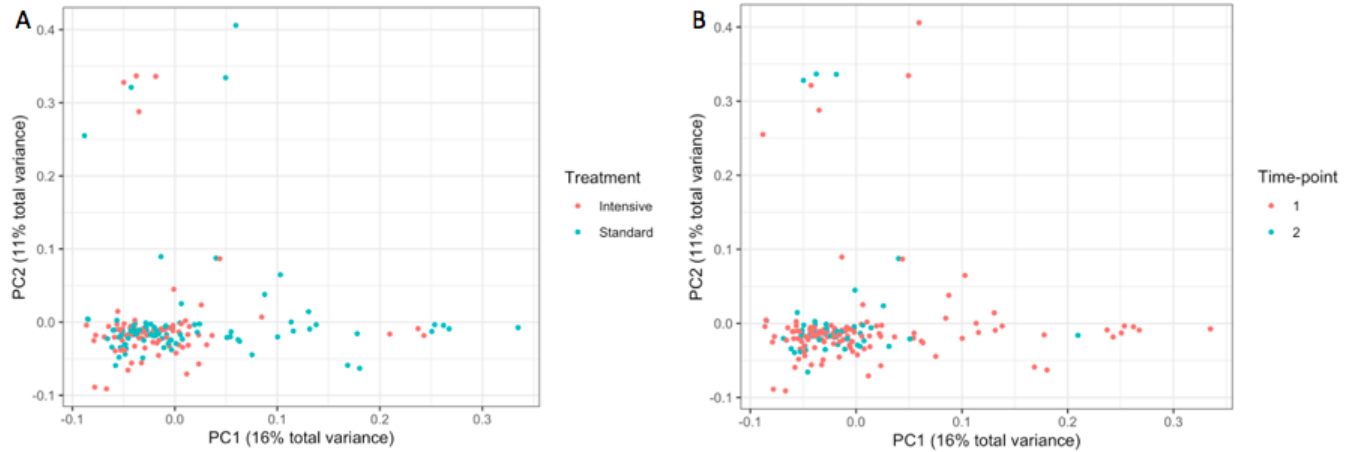

1024

1025

1026 **S3 Figure.** (A) Manhattan plot of unadjusted  $-\log_{10}$  p-values for association of individual SNPs with

1027 per-individual mean egg-reduction rates. (B) QQplot of p-values from the same analysis against

1028 expectations under the null hypothesis.

1029

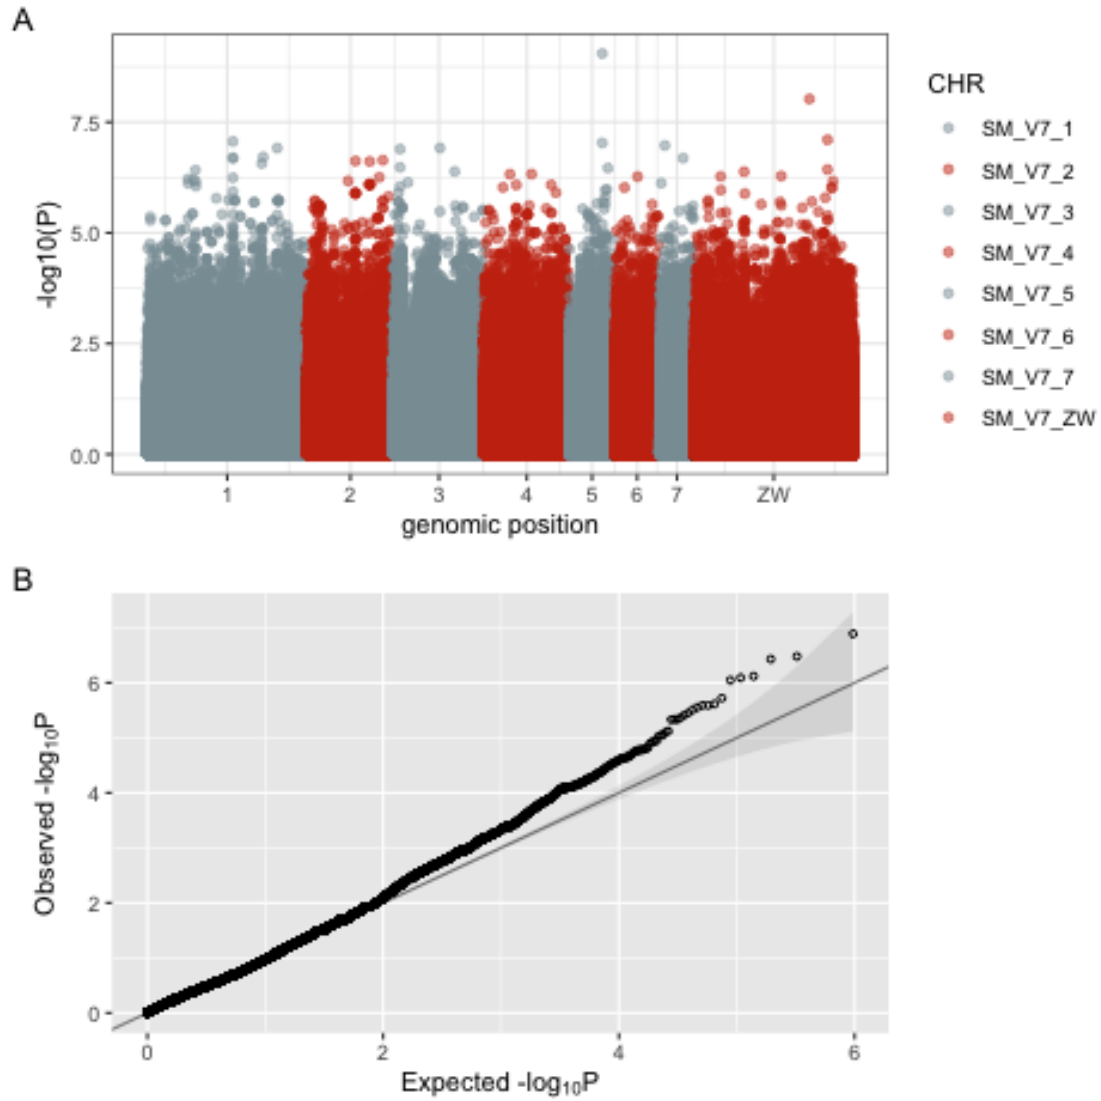



1032 **S4 Figure.** Principal component analysis showing a cluster of nine distinct miracidia on principal  
1033 component 2 in the lower left quadrant.

1034

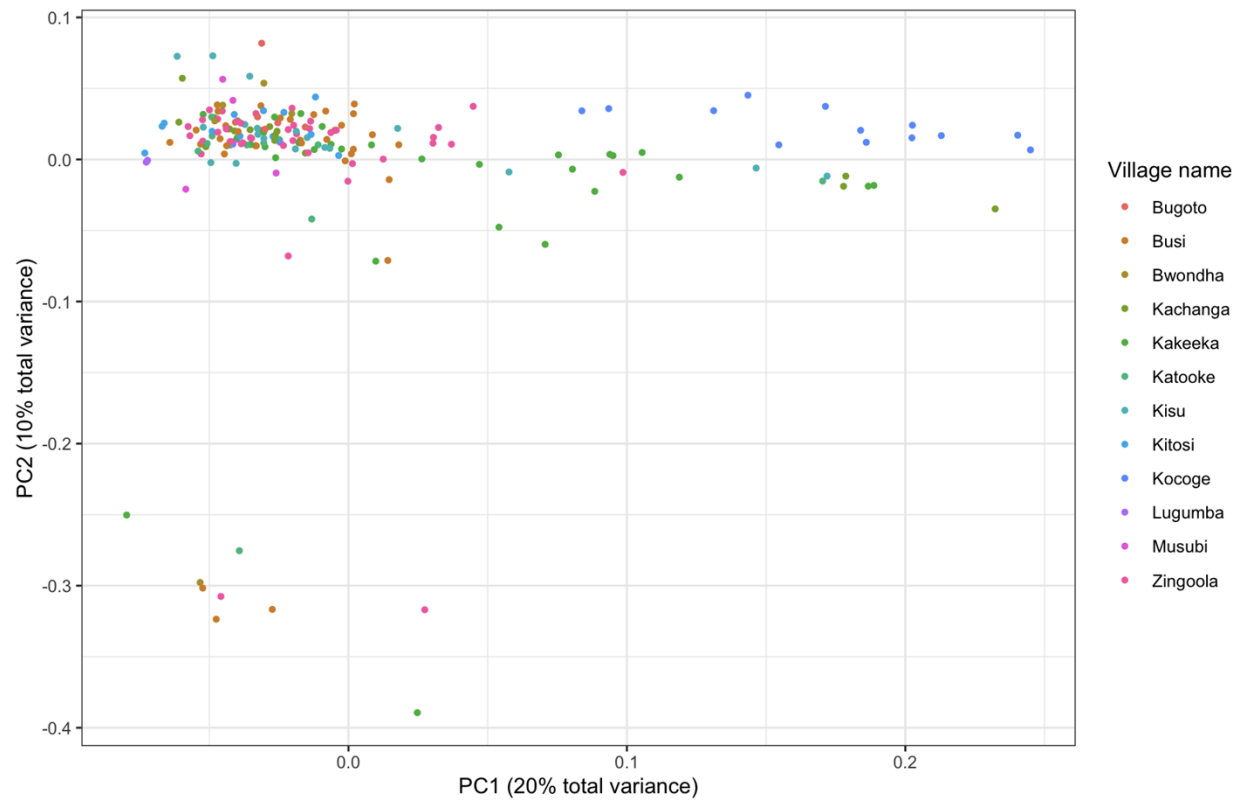

1035

1036

1037

1038

1039

1040

1041

1042

1043

1044 **S1 Table.** Accession numbers and metadata for all samples included in analyses.

1045

| sample_ID       | collection_date | village  | treatment_arm | island | accession_number | Pre/post       |
|-----------------|-----------------|----------|---------------|--------|------------------|----------------|
| 5582STDY7724293 | 10/08/2017      | Kachanga | Standard      | Damba  | ERS2891555       | pre_treatment  |
| 5582STDY7759949 | 26/09/2017      | Zingoola | Standard      | Koome  | ERS2983612       | post_treatment |
| 5582STDY7724231 | 23/08/2017      | Zingoola | Standard      | Koome  | ERS2891493       | pre_treatment  |
| 5582STDY7724309 | 10/08/2017      | Kachanga | Standard      | Damba  | ERS2891571       | pre_treatment  |
| 5582STDY7724319 | 15/11/2017      | Kakeeka  | Standard      | Damba  | ERS2891581       | post_treatment |
| 5582STDY7770933 | 10/07/2017      | Katooke  | Intensive     | Damba  | ERS3016692       | pre_treatment  |
| 5582STDY7770941 | 11/07/2017      | Katooke  | Intensive     | Damba  | ERS3016700       | pre_treatment  |
| 5582STDY7771009 | 10/07/2017      | Katooke  | Intensive     | Damba  | ERS3016761       | pre_treatment  |
| 5582STDY7770939 | 18/10/2017      | Busi     | Intensive     | Koome  | ERS3016698       | pre_treatment  |
| 5582STDY7724259 | 18/10/2017      | Busi     | Intensive     | Koome  | ERS2891521       | pre_treatment  |
| 5582STDY7724252 | 22/11/2017      | Busi     | Intensive     | Koome  | ERS2891514       | post_treatment |
| 5582STDY7770956 | 17/10/2017      | Busi     | Intensive     | Koome  | ERS3016715       | pre_treatment  |
| 5582STDY7724233 | 18/10/2017      | Busi     | Intensive     | Koome  | ERS2891495       | pre_treatment  |
| 5582STDY7724277 | 23/11/2017      | Busi     | Intensive     | Koome  | ERS2891539       | post_treatment |
| 5582STDY7724243 | 18/10/2017      | Busi     | Intensive     | Koome  | ERS2891505       | pre_treatment  |
| 5582STDY7724260 | 22/11/2017      | Busi     | Intensive     | Koome  | ERS2891522       | post_treatment |
| 5582STDY7770991 | 19/10/2017      | Busi     | Intensive     | Koome  | ERS3016764       | pre_treatment  |
| 5582STDY7724269 | 21/11/2017      | Busi     | Intensive     | Koome  | ERS2891531       | post_treatment |
| 5582STDY7770964 | 10/10/2017      | Kakeeka  | Standard      | Damba  | ERS3016723       | pre_treatment  |
| 5582STDY7771101 | 11/10/2017      | Kakeeka  | Standard      | Damba  | ERS3016807       | pre_treatment  |
| 5582STDY7724274 | 11/10/2017      | Kakeeka  | Standard      | Damba  | ERS2891536       | pre_treatment  |
| 5582STDY7724320 | 14/11/2017      | Kakeeka  | Standard      | Damba  | ERS2891582       | post_treatment |
| 5582STDY7771003 | 11/10/2017      | Kakeeka  | Standard      | Damba  | ERS3016755       | pre_treatment  |
| 5582STDY7724265 | 10/10/2017      | Kakeeka  | Standard      | Damba  | ERS2891527       | pre_treatment  |
| 5582STDY7724281 | 09/10/2017      | Kakeeka  | Standard      | Damba  | ERS2891543       | pre_treatment  |
| 5582STDY7724240 | 13/11/2017      | Kakeeka  | Standard      | Damba  | ERS2891502       | post_treatment |
| 5582STDY7771099 | 22/08/2017      | Zingoola | Standard      | Koome  | ERS3016805       | pre_treatment  |
| 5582STDY7771043 | 23/08/2017      | Zingoola | Standard      | Koome  | ERS3016784       | pre_treatment  |

|                 |            |          |           |         |            |                |
|-----------------|------------|----------|-----------|---------|------------|----------------|
| 5582STDY7724322 | 24/08/2017 | Zingoola | Standard  | Koome   | ERS2891584 | pre_treatment  |
| 5582STDY7770915 | 23/08/2017 | Zingoola | Standard  | Koome   | ERS3016674 | pre_treatment  |
| 5582STDY7724285 | 09/08/2017 | Kachanga | Standard  | Damba   | ERS2891547 | pre_treatment  |
| 5582STDY7724288 | 07/11/2017 | Lugumba  | Standard  | Lugumba | ERS2891550 | pre_treatment  |
| 5582STDY7724312 | 07/11/2017 | Lugumba  | Standard  | Lugumba | ERS2891574 | pre_treatment  |
| 5582STDY7770937 | 13/09/2017 | Kachanga | Standard  | Damba   | ERS3016696 | post_treatment |
| 5582STDY7724250 | 09/10/2017 | Kakeeka  | Standard  | Damba   | ERS2891512 | pre_treatment  |
| 5582STDY7771004 | 11/09/2017 | Kachanga | Standard  | Damba   | ERS3016756 | post_treatment |
| 5582STDY7759911 | 24/10/2017 | Kitosi   | Intensive | Koome   | ERS2983579 | pre_treatment  |
| 5582STDY7759950 | 23/10/2017 | Kitosi   | Intensive | Koome   | ERS2983613 | pre_treatment  |
| 5582STDY7759951 | 22/11/2017 | Kitosi   | Intensive | Koome   | ERS2983614 | post_treatment |
| 5582STDY7759895 | 25/10/2017 | Kitosi   | Intensive | Koome   | ERS2983558 | pre_treatment  |
| 5582STDY7759975 | 27/11/2017 | Kitosi   | Intensive | Koome   | ERS2983632 | post_treatment |
| 5582STDY7770926 | 10/07/2017 | Katooke  | Intensive | Damba   | ERS3016685 | pre_treatment  |
| 5582STDY7759885 | 27/09/2017 | Zingoola | Standard  | Koome   | ERS2983563 | post_treatment |
| 5582STDY7770928 | 27/09/2017 | Zingoola | Standard  | Koome   | ERS3016687 | post_treatment |
| 5582STDY7770942 | 09/10/2017 | Kakeeka  | Standard  | Damba   | ERS3016701 | pre_treatment  |
| 5582STDY7770948 | 11/10/2017 | Kakeeka  | Standard  | Damba   | ERS3016707 | pre_treatment  |
| 5582STDY7771093 | 10/10/2017 | Kakeeka  | Standard  | Damba   | ERS3016804 | pre_treatment  |
| 5582STDY7724242 | 09/10/2017 | Kakeeka  | Standard  | Damba   | ERS2891504 | pre_treatment  |
| 5582STDY7724297 | 11/10/2017 | Kakeeka  | Standard  | Damba   | ERS2891559 | pre_treatment  |
| 5582STDY7771022 | 10/10/2017 | Kakeeka  | Standard  | Damba   | ERS3016777 | pre_treatment  |
| 5582STDY7770987 | 12/10/2017 | Kakeeka  | Standard  | Damba   | ERS3016746 | pre_treatment  |
| 5582STDY7771035 | 23/08/2017 | Zingoola | Standard  | Koome   | ERS3016781 | pre_treatment  |
| 5582STDY7759963 | 31/10/2017 | Kisu     | Intensive | Damba   | ERS2983622 | pre_treatment  |
| 5582STDY7770938 | 06/12/2017 | Kisu     | Intensive | Damba   | ERS3016697 | post_treatment |
| 5582STDY7759939 | 31/10/2017 | Kisu     | Intensive | Damba   | ERS2983603 | pre_treatment  |
| 5582STDY7759930 | 05/12/2017 | Kisu     | Intensive | Damba   | ERS2983595 | post_treatment |
| 5582STDY7759954 | 06/12/2017 | Kisu     | Intensive | Damba   | ERS2983615 | post_treatment |
| 5582STDY7770954 | 06/12/2017 | Kisu     | Intensive | Damba   | ERS3016713 | post_treatment |
| 5582STDY7770961 | 05/12/2017 | Kisu     | Intensive | Damba   | ERS3016720 | post_treatment |
| 5582STDY7759962 | 06/12/2017 | Kisu     | Intensive | Damba   | ERS2983621 | post_treatment |
| 5582STDY7770943 | 24/08/2017 | Zingoola | Standard  | Koome   | ERS3016702 | pre_treatment  |

|                 |            |          |           |       |            |                |
|-----------------|------------|----------|-----------|-------|------------|----------------|
| 5582STDY7770986 | 24/08/2017 | Zingoola | Standard  | Koome | ERS3016745 | pre_treatment  |
| 5582STDY7759964 | 22/08/2017 | Zingoola | Standard  | Koome | ERS2983623 | pre_treatment  |
| 5582STDY7759965 | 26/09/2017 | Zingoola | Standard  | Koome | ERS2983624 | post_treatment |
| 5582STDY7770951 | 24/08/2017 | Zingoola | Standard  | Koome | ERS3016710 | pre_treatment  |
| 5582STDY7770978 | 24/08/2017 | Zingoola | Standard  | Koome | ERS3016737 | pre_treatment  |
| 5582STDY7771067 | 22/08/2017 | Zingoola | Standard  | Koome | ERS3016793 | pre_treatment  |
| 5582STDY7759887 | 25/10/2017 | Kitosi   | Intensive | Koome | ERS2983565 | pre_treatment  |
| 5582STDY7759966 | 26/10/2017 | Kitosi   | Intensive | Koome | ERS2983625 | pre_treatment  |
| 5582STDY7759919 | 28/11/2017 | Kitosi   | Intensive | Koome | ERS2983586 | post_treatment |
| 5582STDY7771000 | 19/10/2017 | Busi     | Intensive | Koome | ERS3016752 | pre_treatment  |
| 5582STDY7724238 | 08/08/2017 | Kachanga | Standard  | Damba | ERS2891500 | pre_treatment  |
| 5582STDY7724230 | 12/09/2017 | Kachanga | Standard  | Damba | ERS2891492 | post_treatment |
| 5582STDY7724241 | 18/10/2017 | Busi     | Intensive | Koome | ERS2891503 | pre_treatment  |
| 5582STDY7724316 | 17/10/2017 | Busi     | Intensive | Koome | ERS2891578 | pre_treatment  |
| 5582STDY7771044 | 24/08/2017 | Zingoola | Standard  | Koome | ERS3016785 | pre_treatment  |
| 5582STDY7771075 | 22/08/2017 | Zingoola | Standard  | Koome | ERS3016796 | pre_treatment  |
| 5582STDY7724294 | 23/08/2017 | Zingoola | Standard  | Koome | ERS2891556 | pre_treatment  |
| 5582STDY7771002 | 24/08/2017 | Zingoola | Standard  | Koome | ERS3016754 | pre_treatment  |
| 5582STDY7759974 | 25/10/2017 | Kitosi   | Intensive | Koome | ERS2983631 | pre_treatment  |
| 5582STDY7770971 | 11/10/2017 | Kakeeka  | Standard  | Damba | ERS3016730 | pre_treatment  |
| 5582STDY7724249 | 10/10/2017 | Kakeeka  | Standard  | Damba | ERS2891511 | pre_treatment  |
| 5582STDY7770924 | 12/10/2017 | Kakeeka  | Standard  | Damba | ERS3016683 | pre_treatment  |
| 5582STDY7724266 | 11/10/2017 | Kakeeka  | Standard  | Damba | ERS2891528 | pre_treatment  |
| 5582STDY7724247 | 12/10/2017 | Kakeeka  | Standard  | Damba | ERS2891509 | pre_treatment  |
| 5582STDY7724248 | 15/11/2017 | Kakeeka  | Standard  | Damba | ERS2891510 | post_treatment |
| 5582STDY7771014 | 10/10/2017 | Kakeeka  | Standard  | Damba | ERS3016773 | pre_treatment  |
| 5582STDY7724301 | 10/08/2017 | Kachanga | Standard  | Damba | ERS2891563 | pre_treatment  |
| 5582STDY7771076 | 24/10/2017 | Kitosi   | Intensive | Koome | ERS3016797 | pre_treatment  |
| 5582STDY7770977 | 15/07/2017 | Katooke  | Intensive | Damba | ERS3016736 | pre_treatment  |
| 5582STDY7771011 | 23/08/2017 | Zingoola | Standard  | Koome | ERS3016770 | pre_treatment  |
| 5582STDY7770919 | 23/08/2017 | Zingoola | Standard  | Koome | ERS3016678 | pre_treatment  |
| 5582STDY7771091 | 22/08/2017 | Zingoola | Standard  | Koome | ERS3016802 | pre_treatment  |
| 5582STDY7724310 | 23/08/2017 | Zingoola | Standard  | Koome | ERS2891572 | pre_treatment  |

|                 |            |          |           |         |            |                |
|-----------------|------------|----------|-----------|---------|------------|----------------|
| 5582STDY7724272 | 07/11/2017 | Lugumba  | Standard  | Lugumba | ERS2891534 | pre_treatment  |
| 5582STDY7724264 | 13/12/2017 | Lugumba  | Standard  | Lugumba | ERS2891526 | post_treatment |
| 5582STDY7770969 | 12/07/2017 | Katooke  | Intensive | Damba   | ERS3016728 | pre_treatment  |
| 5582STDY7770979 | 12/10/2017 | Kakeeka  | Standard  | Damba   | ERS3016738 | pre_treatment  |
| 5582STDY7759883 | 06/12/2017 | Kisu     | Intensive | Damba   | ERS2983561 | post_treatment |
| 5582STDY7759900 | 30/10/2017 | Kisu     | Intensive | Damba   | ERS2983569 | pre_treatment  |
| 5582STDY7759955 | 01/11/2017 | Kisu     | Intensive | Damba   | ERS2983616 | pre_treatment  |
| 5582STDY7770922 | 06/12/2017 | Kisu     | Intensive | Damba   | ERS3016681 | post_treatment |
| 5582STDY7759904 | 17/08/2017 | Katooke  | Intensive | Damba   | ERS2983573 | post_treatment |
| 5582STDY7759916 | 01/11/2017 | Kisu     | Intensive | Damba   | ERS2983583 | pre_treatment  |
| 5582STDY7724287 | 09/10/2017 | Kakeeka  | Standard  | Damba   | ERS2891549 | pre_treatment  |
| 5582STDY7724273 | 10/10/2017 | Kakeeka  | Standard  | Damba   | ERS2891535 | pre_treatment  |
| 5582STDY7724236 | 23/11/2017 | Busi     | Intensive | Koome   | ERS2891498 | post_treatment |
| 5582STDY7724244 | 22/11/2017 | Busi     | Intensive | Koome   | ERS2891506 | post_treatment |
| 5582STDY7724253 | 18/10/2017 | Busi     | Intensive | Koome   | ERS2891515 | pre_treatment  |
| 5582STDY7724291 | 17/10/2017 | Busi     | Intensive | Koome   | ERS2891553 | pre_treatment  |
| 5582STDY7770990 | 23/11/2017 | Busi     | Intensive | Koome   | ERS3016763 | post_treatment |
| 5582STDY7724315 | 23/11/2017 | Busi     | Intensive | Koome   | ERS2891577 | post_treatment |
| 5582STDY7771068 | 23/10/2017 | Kitosi   | Intensive | Koome   | ERS3016794 | pre_treatment  |
| 5582STDY7724278 | 22/08/2017 | Zingoola | Standard  | Koome   | ERS2891540 | pre_treatment  |
| 5582STDY7759941 | 27/09/2017 | Zingoola | Standard  | Koome   | ERS2983605 | post_treatment |
| 5582STDY7771036 | 24/08/2017 | Zingoola | Standard  | Koome   | ERS3016782 | pre_treatment  |
| 5582STDY7771051 | 23/08/2017 | Zingoola | Standard  | Koome   | ERS3016787 | pre_treatment  |
| 5582STDY7771007 | 18/10/2017 | Busi     | Intensive | Koome   | ERS3016759 | pre_treatment  |
| 5582STDY7724308 | 18/10/2017 | Busi     | Intensive | Koome   | ERS2891570 | pre_treatment  |
| 5582STDY7724276 | 22/11/2017 | Busi     | Intensive | Koome   | ERS2891538 | post_treatment |
| 5582STDY7759925 | 27/09/2017 | Zingoola | Standard  | Koome   | ERS2983591 | post_treatment |
| 5582STDY7759918 | 23/10/2017 | Kitosi   | Intensive | Koome   | ERS2983585 | pre_treatment  |
| 5582STDY7759926 | 24/10/2017 | Kitosi   | Intensive | Koome   | ERS2983592 | pre_treatment  |
| 5582STDY7724229 | 18/10/2017 | Busi     | Intensive | Koome   | ERS2891491 | pre_treatment  |
| 5582STDY7724227 | 17/10/2017 | Busi     | Intensive | Koome   | ERS2891489 | pre_treatment  |
| 5582STDY7724235 | 19/10/2017 | Busi     | Intensive | Koome   | ERS2891497 | pre_treatment  |
| 5582STDY7724268 | 22/11/2017 | Busi     | Intensive | Koome   | ERS2891530 | post_treatment |

|                 |            |          |           |         |            |                |
|-----------------|------------|----------|-----------|---------|------------|----------------|
| 5582STDY7724300 | 23/11/2017 | Busi     | Intensive | Koome   | ERS2891562 | post_treatment |
| 5582STDY7770959 | 24/08/2017 | Zingoola | Standard  | Koome   | ERS3016718 | pre_treatment  |
| 5582STDY7771059 | 22/08/2017 | Zingoola | Standard  | Koome   | ERS3016790 | pre_treatment  |
| 5582STDY7771010 | 24/08/2017 | Zingoola | Standard  | Koome   | ERS3016769 | pre_treatment  |
| 5582STDY7770929 | 27/09/2017 | Zingoola | Standard  | Koome   | ERS3016688 | post_treatment |
| 5582STDY7770935 | 24/08/2017 | Zingoola | Standard  | Koome   | ERS3016694 | pre_treatment  |
| 5582STDY7724302 | 23/08/2017 | Zingoola | Standard  | Koome   | ERS2891564 | pre_treatment  |
| 5582STDY7771028 | 24/08/2017 | Zingoola | Standard  | Koome   | ERS3016779 | pre_treatment  |
| 5582STDY7759888 | 13/07/2017 | Katooke  | Intensive | Damba   | ERS2983566 | pre_treatment  |
| 5582STDY7759928 | 16/08/2017 | Katooke  | Intensive | Damba   | ERS2983594 | post_treatment |
| 5582STDY7770944 | 13/09/2017 | Kachanga | Standard  | Damba   | ERS3016703 | post_treatment |
| 5582STDY7759936 | 15/08/2017 | Katooke  | Intensive | Damba   | ERS2983601 | pre_treatment  |
| 5582STDY7759944 | 13/09/2017 | Kachanga | Standard  | Damba   | ERS2983608 | post_treatment |
| 5582STDY7770976 | 18/10/2017 | Busi     | Intensive | Koome   | ERS3016735 | pre_treatment  |
| 5582STDY7770953 | 24/08/2017 | Zingoola | Standard  | Koome   | ERS3016712 | pre_treatment  |
| 5582STDY7759894 | 28/09/2017 | Zingoola | Standard  | Koome   | ERS2983557 | post_treatment |
| 5582STDY7759901 | 28/09/2017 | Zingoola | Standard  | Koome   | ERS2983570 | post_treatment |
| 5582STDY7771008 | 17/10/2017 | Busi     | Intensive | Koome   | ERS3016760 | pre_treatment  |
| 5582STDY7770982 | 07/08/2017 | Kachanga | Standard  | Damba   | ERS3016741 | pre_treatment  |
| 5582STDY7770936 | 13/09/2017 | Kachanga | Standard  | Damba   | ERS3016695 | post_treatment |
| 5582STDY7770927 | 24/08/2017 | Zingoola | Standard  | Koome   | ERS3016686 | pre_treatment  |
| 5582STDY7759933 | 26/09/2017 | Zingoola | Standard  | Koome   | ERS2983598 | post_treatment |
| 5582STDY7724286 | 23/08/2017 | Zingoola | Standard  | Koome   | ERS2891548 | pre_treatment  |
| 5582STDY7770945 | 27/09/2017 | Zingoola | Standard  | Koome   | ERS3016704 | post_treatment |
| 5582STDY7770966 | 22/11/2017 | Busi     | Intensive | Koome   | ERS3016725 | post_treatment |
| 5582STDY7724245 | 19/10/2017 | Busi     | Intensive | Koome   | ERS2891507 | pre_treatment  |
| 5582STDY7724313 | 18/10/2017 | Busi     | Intensive | Koome   | ERS2891575 | pre_treatment  |
| 5582STDY7724237 | 18/10/2017 | Busi     | Intensive | Koome   | ERS2891499 | pre_treatment  |
| 5582STDY7724304 | 08/11/2017 | Lugumba  | Standard  | Lugumba | ERS2891566 | pre_treatment  |
| 5582STDY7770983 | 17/10/2017 | Busi     | Intensive | Koome   | ERS3016742 | pre_treatment  |
| 5582STDY7759938 | 05/12/2017 | Kisu     | Intensive | Damba   | ERS2983602 | post_treatment |
| 5582STDY7771053 | 01/11/2017 | Kisu     | Intensive | Damba   | ERS3016789 | pre_treatment  |
| 5582STDY7771061 | 31/10/2017 | Kisu     | Intensive | Damba   | ERS3016792 | pre_treatment  |

|                 |            |          |           |       |            |                |
|-----------------|------------|----------|-----------|-------|------------|----------------|
| 5582STDY7759906 | 31/10/2017 | Kisu     | Intensive | Damba | ERS2983574 | pre_treatment  |
| 5582STDY7759898 | 07/12/2017 | Kisu     | Intensive | Damba | ERS2983567 | post_treatment |
| 5582STDY7759882 | 06/12/2017 | Kisu     | Intensive | Damba | ERS2983560 | post_treatment |
| 5582STDY7724317 | 13/09/2017 | Kachanga | Standard  | Damba | ERS2891579 | post_treatment |
| 5582STDY7724263 | 11/10/2017 | Kakeeka  | Standard  | Damba | ERS2891525 | pre_treatment  |
| 5582STDY7724279 | 10/10/2017 | Kakeeka  | Standard  | Damba | ERS2891541 | pre_treatment  |
| 5582STDY7770916 | 11/10/2017 | Kakeeka  | Standard  | Damba | ERS3016675 | pre_treatment  |
| 5582STDY7724271 | 09/10/2017 | Kakeeka  | Standard  | Damba | ERS2891533 | pre_treatment  |
| 5582STDY7770957 | 07/08/2017 | Kachanga | Standard  | Damba | ERS3016716 | pre_treatment  |
| 5582STDY7770973 | 09/08/2017 | Kachanga | Standard  | Damba | ERS3016732 | pre_treatment  |
| 5582STDY7770950 | 10/10/2017 | Kakeeka  | Standard  | Damba | ERS3016709 | pre_treatment  |
| 5582STDY7771029 | 01/11/2017 | Kisu     | Intensive | Damba | ERS3016780 | pre_treatment  |
| 5582STDY7770975 | 17/10/2017 | Busi     | Intensive | Koome | ERS3016734 | pre_treatment  |
| 5582STDY7770984 | 19/10/2017 | Busi     | Intensive | Koome | ERS3016743 | pre_treatment  |

1046

1047

1048 **S2 Table.** Protein coding genes present in the region of highest genetic differentiation on  
 1049 chromosome 5. (region X on Fig. 4B).

1050

| 1051 | Chromosome | GeneID     | Function_name                                            |
|------|------------|------------|----------------------------------------------------------|
| 1052 | SM_V7_5    | Smp_026090 | Ras-related GTP-binding protein D                        |
| 1053 | SM_V7_5    | Smp_026160 | Growth hormone-inducible transmembrane protein           |
| 1054 | SM_V7_5    | Smp_026190 | Probable U3 small nucleolar RNA-associated protein 11    |
| 1055 | SM_V7_5    | Smp_101230 | Phenylalanine--tRNA ligase alpha subunit                 |
| 1056 | SM_V7_5    | Smp_102040 | Guanine nucleotide-binding protein subunit beta-2-like 1 |
| 1057 | SM_V7_5    | Smp_129950 | RNA-binding protein 12                                   |
| 1058 | SM_V7_5    | Smp_129960 | Nestin                                                   |
| 1059 | SM_V7_5    | Smp_129970 | Hypothetical protein                                     |

|      |         |            |                                                                                |
|------|---------|------------|--------------------------------------------------------------------------------|
| 1060 | SM_V7_5 | Smp_136240 | Vesicle-associated membrane protein/synaptobrevin-binding protein              |
| 1061 | SM_V7_5 | Smp_136260 | Glutamine--fructose-6-phosphate aminotransferase [isomerizing] 2               |
| 1062 | SM_V7_5 | Smp_136280 | Regulator of telomere elongation helicase 1                                    |
| 1063 | SM_V7_5 | Smp_136300 | tyrosine kinase, TK group, Src family                                          |
| 1064 | SM_V7_5 | Smp_136310 | Sodium/bile acid cotransporter                                                 |
| 1065 | SM_V7_5 | Smp_178810 | 26S proteasome non-ATPase regulatory subunit 13                                |
| 1066 | SM_V7_5 | Smp_242830 | Prolyl 3-hydroxylase OGFOD1                                                    |
| 1067 | SM_V7_5 | Smp_242860 | Trafficking protein particle complex subunit 8                                 |
| 1068 | SM_V7_5 | Smp_247640 | ATPase synthesis protein 25, mitochondrial                                     |
| 1069 | SM_V7_5 | Smp_247650 | Eukaryotic translation initiation factor 3 subunit D                           |
| 1070 | SM_V7_5 | Smp_267060 | Tether containing UBX domain for GLUT4                                         |
| 1071 | SM_V7_5 | Smp_314360 | Phenylalanine--tRNA ligase alpha subunit                                       |
| 1072 | SM_V7_5 | Smp_316680 | Phenylalanine--tRNA ligase alpha subunit                                       |
| 1073 | SM_V7_5 | Smp_332100 | 40S ribosomal protein S28                                                      |
| 1074 | SM_V7_5 | Smp_341690 | Golgi-specific brefeldin A-resistance guanine nucleotide exchange factor 1     |
| 1075 | SM_V7_5 | Smp_346850 | Acetyl-coenzyme A carboxylase carboxyl transferase subunit beta, chloroplastic |
| 1076 | SM_V7_5 | Smp_347070 | Calcium/calmodulin-dependent protein kinase type IV                            |
| 1077 |         |            |                                                                                |



1078

1079 **S3 Table.** GO terms significantly over-represented among genes overlapping regions of different  
 1080 natural selection. Genes are from GO hierarchies for Molecular Function (MF), Biological  
 1081 Processes (BP), KEGG pathways and Cellular Component (CC) within the post-treatment (Tp2).  
 1082 Standard (Std) and Intensive (Int) groups with respective adjusted p-values ( $P_{adj}$ ). Asterisks mark  
 1083 terms that remain enriched in autosomal gene sets.

1084

| Gro<br>up | GO | Term_name                                                    | GO_ID      | number<br>of genes | $P_{adj}$              |
|-----------|----|--------------------------------------------------------------|------------|--------------------|------------------------|
| Tp2       | MF | Purine-nucleoside phosphorylase activity                     | GO:0004731 | 5                  | $1.616 \times 10^{-8}$ |
| Tp2       | MF | Transferase activity, transferring pentosyl groups           | GO:0016763 | 6                  | $1.352 \times 10^{-5}$ |
| Tp2       | MF | Transferase activity, transferring glycosyl groups           | GO:0016757 | 10                 | $8.088 \times 10^{-4}$ |
| Tp2       | MF | S-methyl-5-thioadenosine phosphorylase activity              | GO:0017061 | 2                  | $1.678 \times 10^{-2}$ |
| Tp2       | MF | Phosphatidylinositol-4,5-bisphosphate 4-phosphatase activity | GO:0034597 | 2                  | $1.678 \times 10^{-2}$ |
| Tp2       | MF | Phosphatidylinositol-4,5-bisphosphate phosphatase activity   | GO:0106019 | 2                  | $1.678 \times 10^{-2}$ |
| Tp2       | MF | Phosphatidylinositol bisphosphate phosphatase activity       | GO:0034593 | 2                  | $4.999 \times 10^{-2}$ |
| Tp2       | MF | Phosphatidylinositol phosphate 4-phosphatase activity        | GO:0034596 | 2                  | $4.999 \times 10^{-2}$ |
| Tp2       | BP | Nucleoside metabolic process                                 | GO:0009116 | 5                  | $8.312 \times 10^{-3}$ |
| Tp2       | BP | Glycosyl compound metabolic process                          | GO:1901657 | 5                  | $8.312 \times 10^{-3}$ |
| Tp2       | BP | Carbohydrate derivative metabolic process                    | GO:1901135 | 11                 | $9.720 \times 10^{-3}$ |
| Tp2       | BP | L-methionine salvage from methylthioadenosine                | GO:0019509 | 2                  | $4.958 \times 10^{-2}$ |

|     |          |                                                          |            |   |                        |
|-----|----------|----------------------------------------------------------|------------|---|------------------------|
| Tp2 | BP       | Amino acid salvage                                       | GO:0043102 | 2 | 4.958×10 <sup>-2</sup> |
| Tp2 | BP       | L-methionine biosynthetic process                        | GO:0071265 | 2 | 4.958×10 <sup>-2</sup> |
| Tp2 | BP       | L-methionine salvage                                     | GO:0071267 | 2 | 4.958×10 <sup>-2</sup> |
| Tp2 | CC       | Late endosome membrane                                   | GO:0031902 | 2 | 4.997X10 <sup>-2</sup> |
| Tp2 | KE<br>GG | Fatty acid Metabolism                                    | KEGG:01212 | 3 | 1.363X10 <sup>-2</sup> |
| Int | MF       | Peroxidase activity*                                     | GO:0004601 | 5 | 2.809×10 <sup>-4</sup> |
| Int | MF       | Oxidoreductase activity, acting on peroxide as acceptor* | GO:0016684 | 5 | 4.164×10 <sup>-4</sup> |
| Int | MF       | Antioxidant activity*                                    | GO:0016209 | 5 | 2.627×10 <sup>-3</sup> |
| Int | MF       | Heme binding*                                            | GO:0020037 | 5 | 4.241×10 <sup>-3</sup> |
| Int | MF       | Tetrapyrrole binding*                                    | GO:0046906 | 5 | 4.241×10 <sup>-3</sup> |
| Int | BP       | Response to toxic substance*                             | GO:0009636 | 5 | 1.658X10 <sup>-3</sup> |
| Int | BP       | Cellular response to toxic substance*                    | GO:0097237 | 5 | 1.658X10 <sup>-3</sup> |
| Int | BP       | Detoxification*                                          | GO:0098754 | 5 | 1.658X10 <sup>-3</sup> |
| Int | BP       | Cellular oxidant detoxification*                         | GO:0098869 | 5 | 1.658X10 <sup>-3</sup> |
| Int | BP       | Cellular detoxification*                                 | GO:1990748 | 5 | 1.658X10 <sup>-3</sup> |
| Std | MF       | tRNA-specific adenosine deaminase activity*              | GO:0008251 | 2 | 8.869X10 <sup>-3</sup> |
| Std | MF       | tRNA-specific adenosine-34 deaminase activity*           | GO:0052717 | 2 | 8.369X10 <sup>-3</sup> |
| Std | MF       | adenosine deaminase activity*                            | GO:0004000 | 2 | 4.981X10 <sup>-2</sup> |
| Std | CC       | tRNA-specific adenosine-34 deaminase complex*            | GO:0052718 | 2 | 5.060X10 <sup>-2</sup> |

1085

1086

1087
